# Supplementary material for: Synthesis and catalytic activity of fluorous chiral primary amine-thioureas
Source: Royal Society of Chemistry journal article supplement (doi:10.1039/c3nj00807j), 2013-01-01
Supplement: c3nj00807j.pdf [file c3nj00807j.pdf]

# Synthesis and catalytic activity of fluoros chiral primary amine-thioureas

Simonetta Orlandi,<sup>a</sup> Gianluca Pozzi,<sup>\*a</sup> Mauro Ghisetti<sup>b</sup> and Maurizio Benaglia<sup>\*b</sup>

<sup>a</sup> CNR-Istituto di Scienze e Tecnologie Molecolari, via Golgi 19, 20133 Milano, Italy.  
E-mail: gianluca.pozzi@istm.cnr.it

<sup>a</sup> Dipartimento di Chimica, Università degli Studi di Milano, via Golgi 19, 20133 Milano, Italy.  
E-mail: maurizio.benaglia@unimi.it

## *New Journal of Chemistry*

### Supporting Information

#### *Table of contents:*

Synthesis of thiourea catalysts. NMR spectra (<sup>1</sup>H NMR, <sup>13</sup>C NMR, <sup>19</sup>F NMR)

- 4-(*n*-Perfluorooctyl)aniline (**5**) p. 2
- 3-(*n*-Perfluorooctyl)aniline (**6**) p. 4
- 2-(*n*-Perfluorooctyl)aniline (**7**) p. 6
- Isothiocyanato-4-(*n*-perfluorooctyl)benzene (**8**) p. 8
- Isothiocyanato-3-(*n*-perfluorooctyl)benzene (**9**) p. 10
- Isothiocyanato-2-(*n*-perfluorooctyl)benzene (**10**) p. 12
- 1-[(*1R,2R*)-2-Aminocyclohexyl]-3-[4-(*n*-Perfluorooctyl)phenyl]thiourea (**1**) p. 14
- 1-[(*1R,2R*)-2-Aminocyclohexyl]-3-[3-(*n*-Perfluorooctyl)phenyl]thiourea (**2**) p. 16
- 1-[(*1R,2R*)-2-Aminocyclohexyl]-3-[2-(*n*-Perfluorooctyl)phenyl]thiourea (**3**) p. 18

Michael addition of aldehydes to *N*-substituted maleimides. HPLC traces of racemic and enantioenriched products

- 2-(2,5-Dioxo-1-phenylpyrrolidin-3-yl)-2-methylpropanal (**16**) p. 20
- 2-(1-(4-Chlorophenyl)-2,5-dioxopyrrolidin-3-yl)-2-methylpropanal (**17**) p. 23
- 2-(2,5-Dioxo-1-*p*-tolylpyrrolidin-3-yl)-2-methylpropanal (**18**) p. 24
- 2-(1-(4-Methoxyphenyl)-2,5-dioxopyrrolidin-3-yl)-2-methylpropanal (**19**) p. 25
- 2-(1-Benzyl-2,5-dioxopyrrolidin-3-yl)-2-methylpropanal (**20**) p. 26
- 1-(2,5-Dioxo-1-phenylpyrrolidin-3-yl)cyclohexanecarbaldehyde (**21**) p. 27
- 2-(2,5-dioxo-1-phenylpyrrolidin-3-yl)propanal (**22**) p. 28

Michael addition of nitromethane to 4-phenylbut-3-en-2-one.

- 5-Nitro-4-phenylpentan-2-one (**25**): HPLC traces of racemic and enantioenriched product p. 29

Michael addition of acetophenone to *trans*-β-nitrostyrene.

- 4-Nitro-1,3-diphenylbutan-1-one (**27**): HPLC traces of racemic and enantioenriched product p. 32

References p. 35

4-(*n*-Perfluorooctyl)aniline (5):

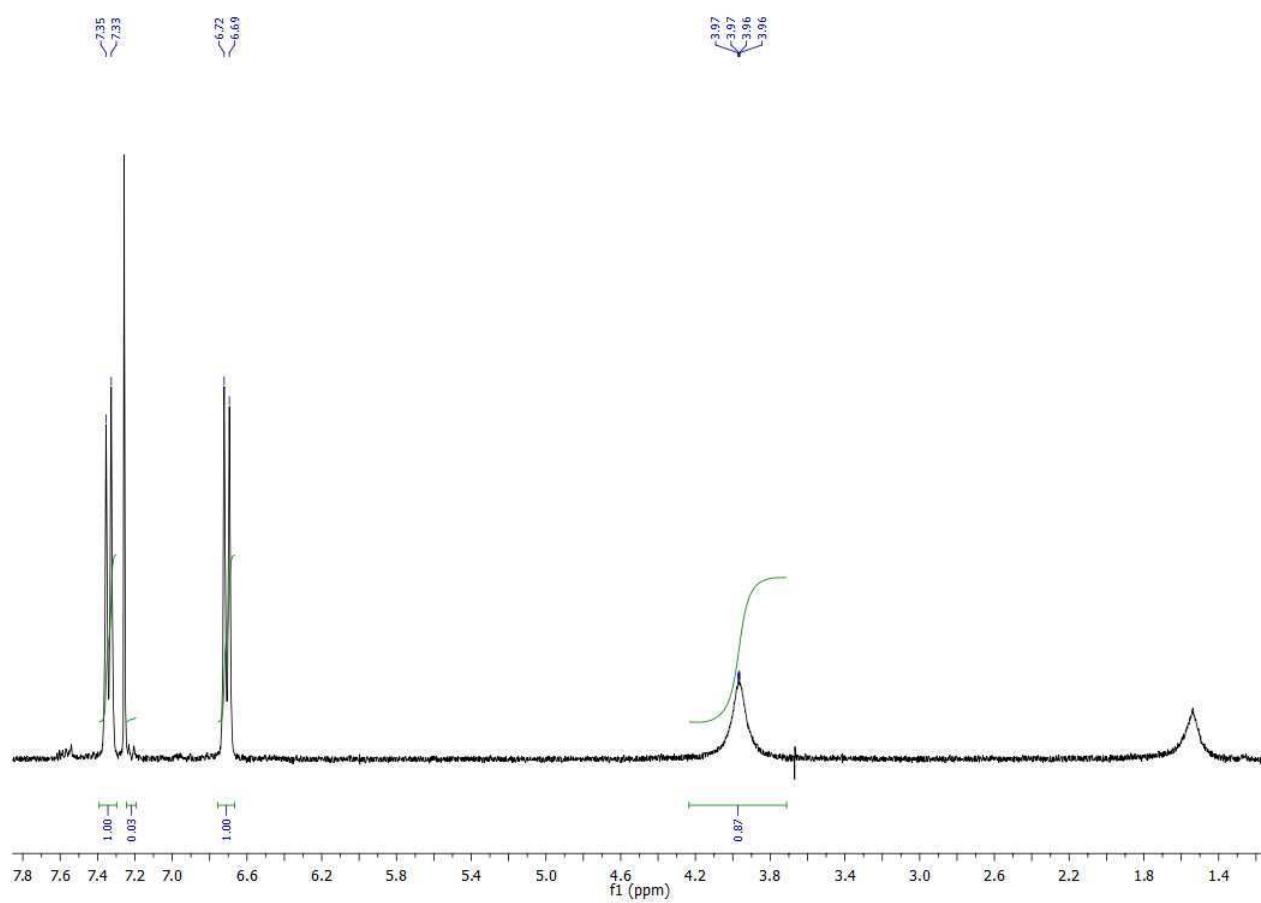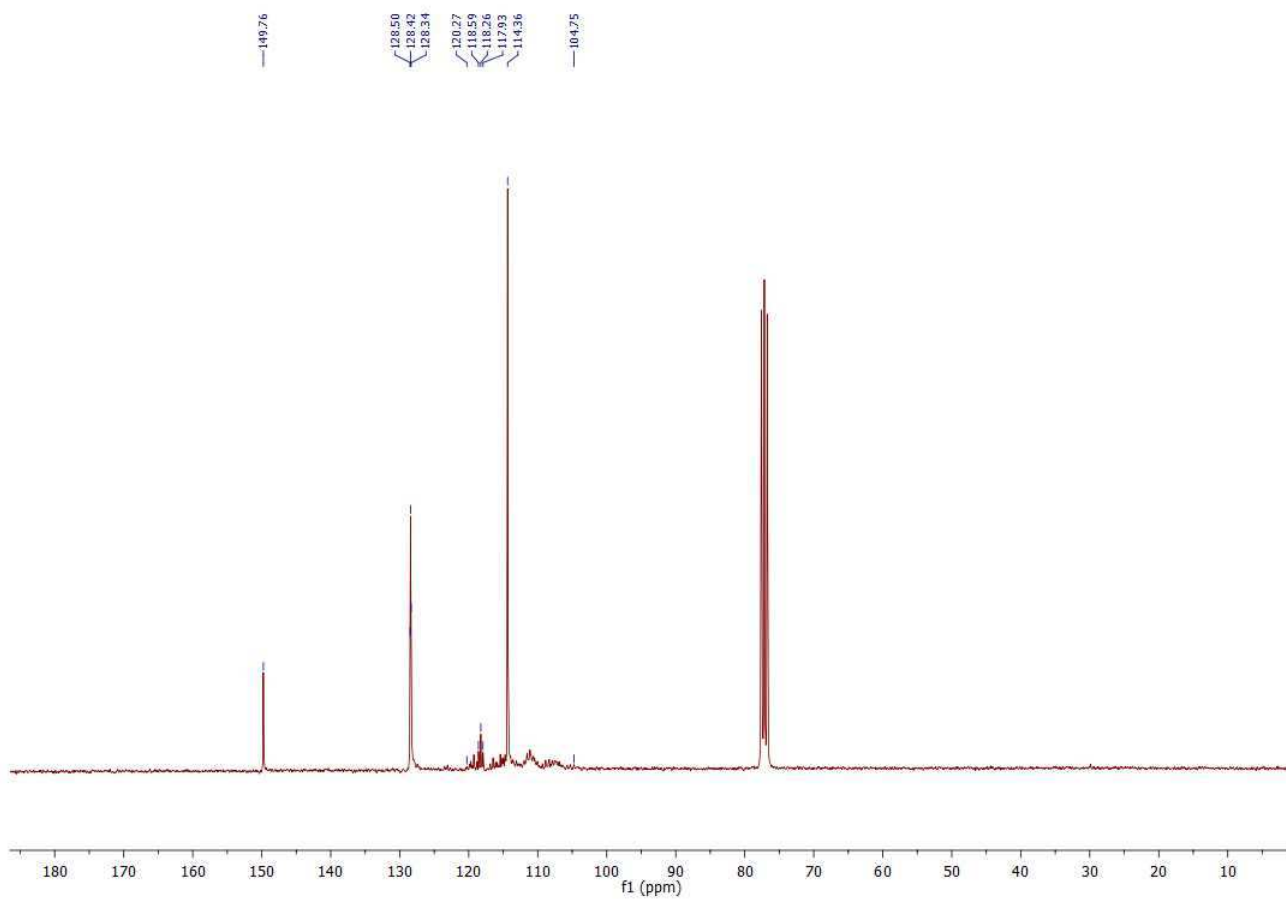

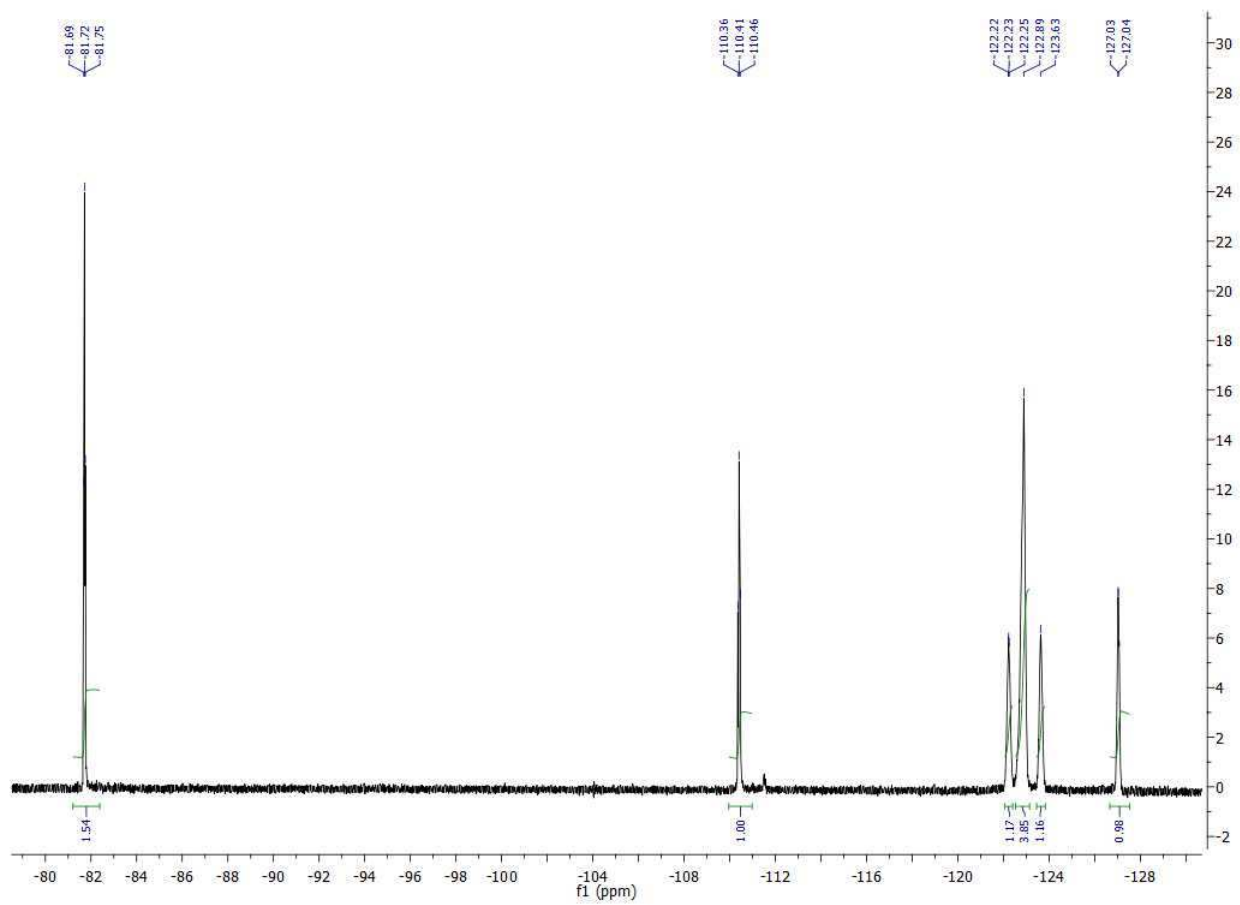

**3-(*n*-Perfluorooctyl)aniline (6):**

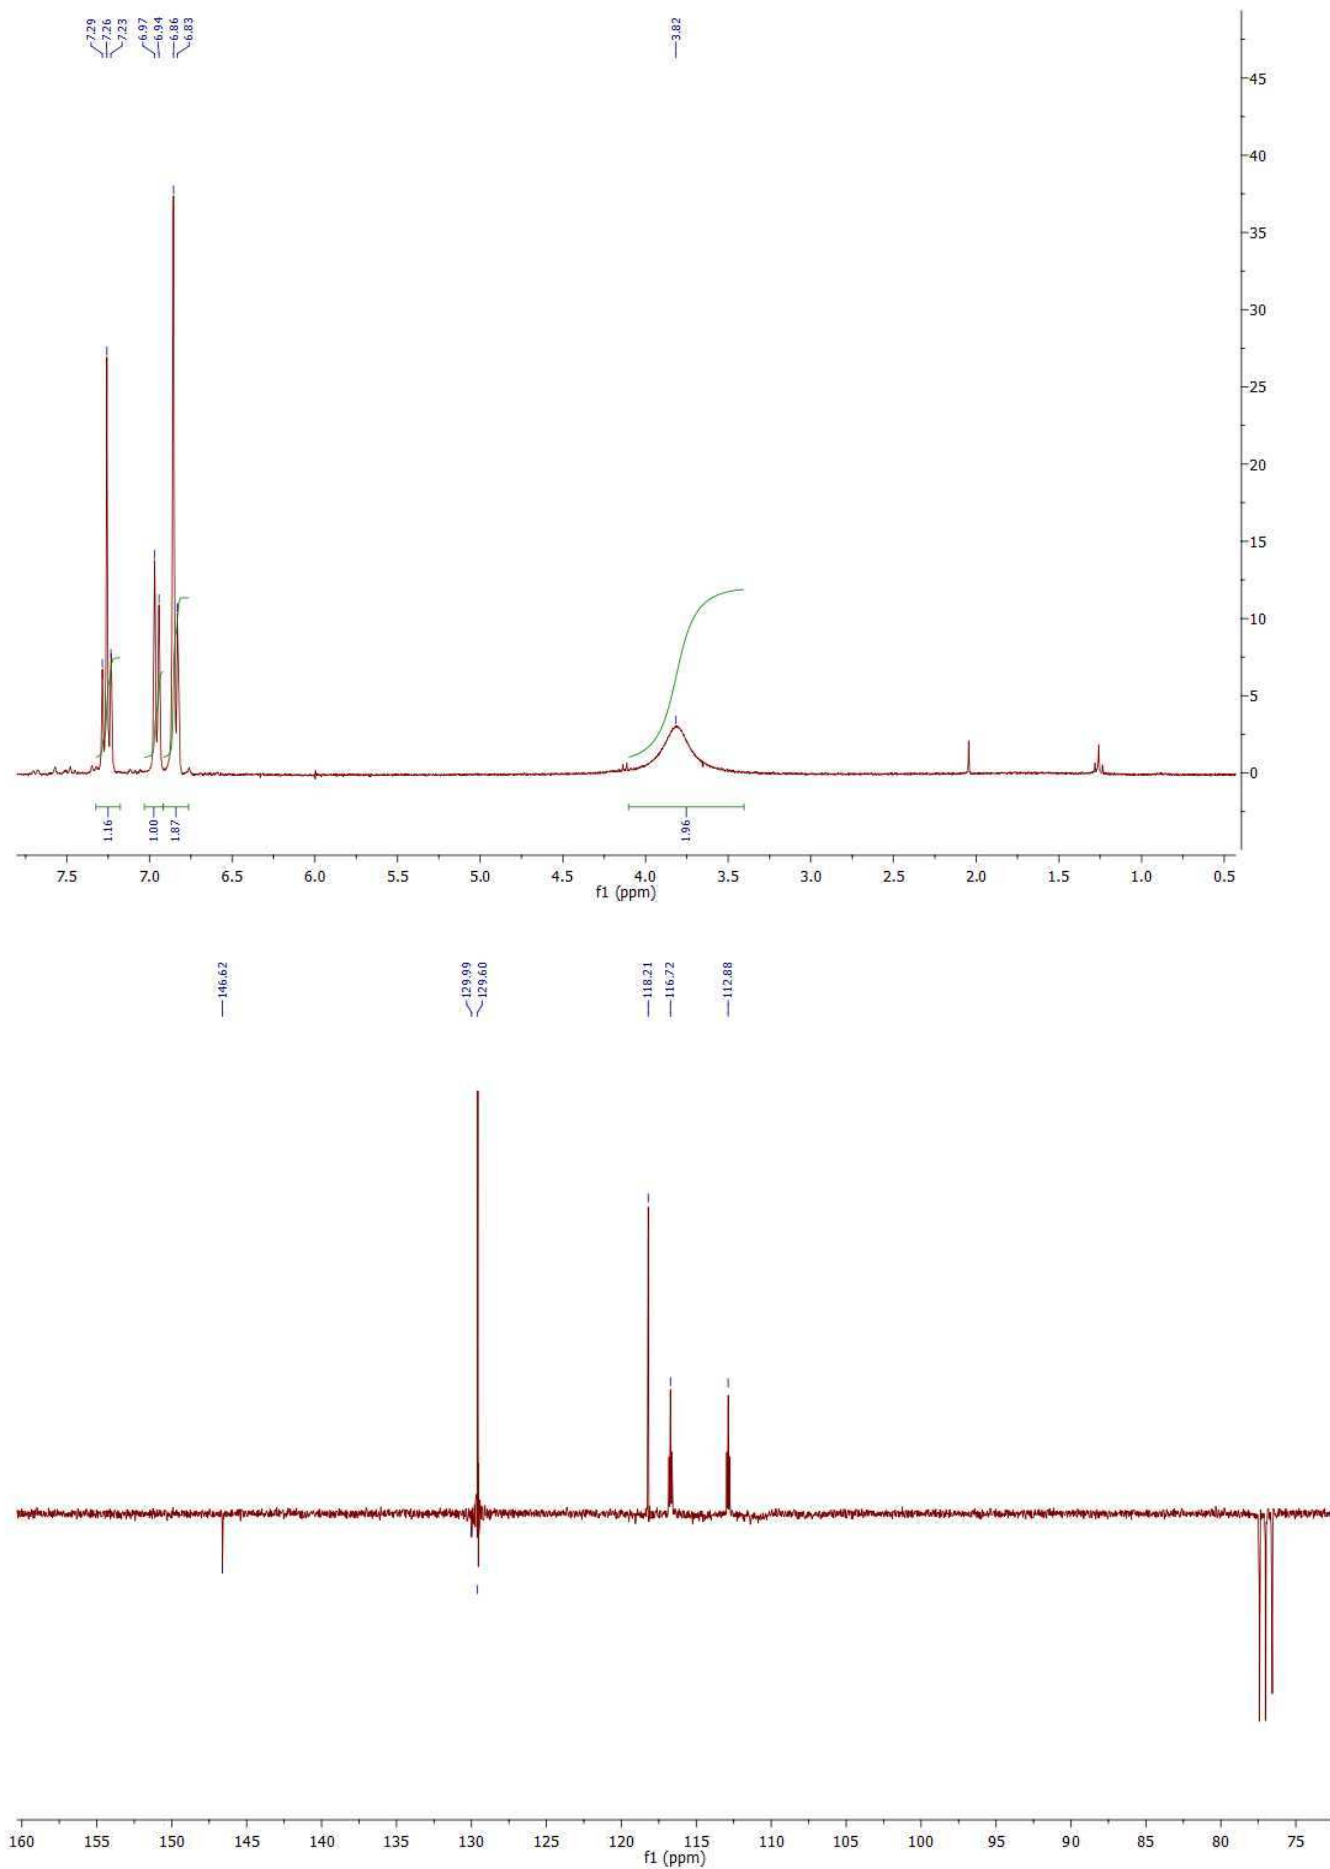

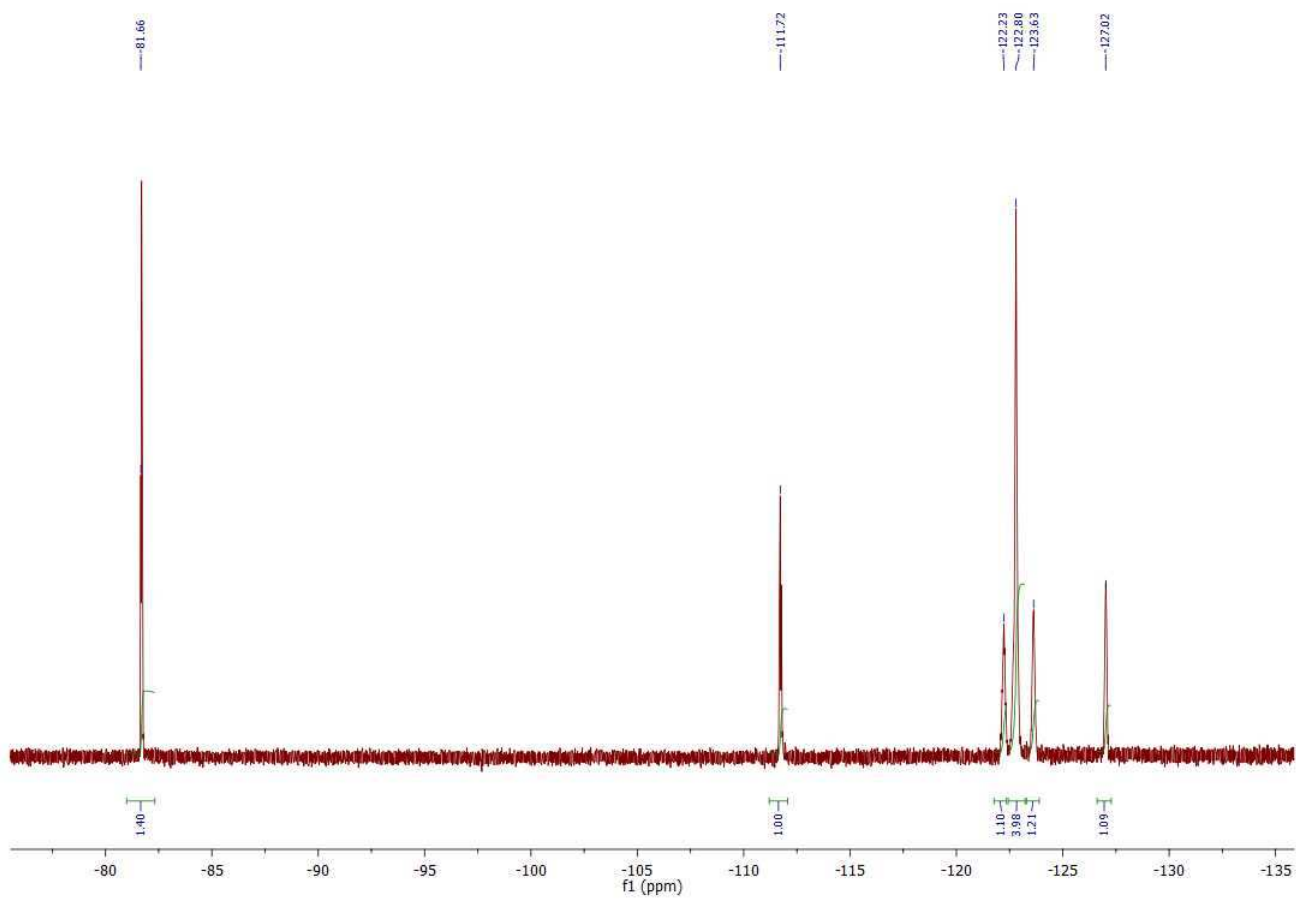

**2-(*n*-Perfluorooctyl)aniline (7):**

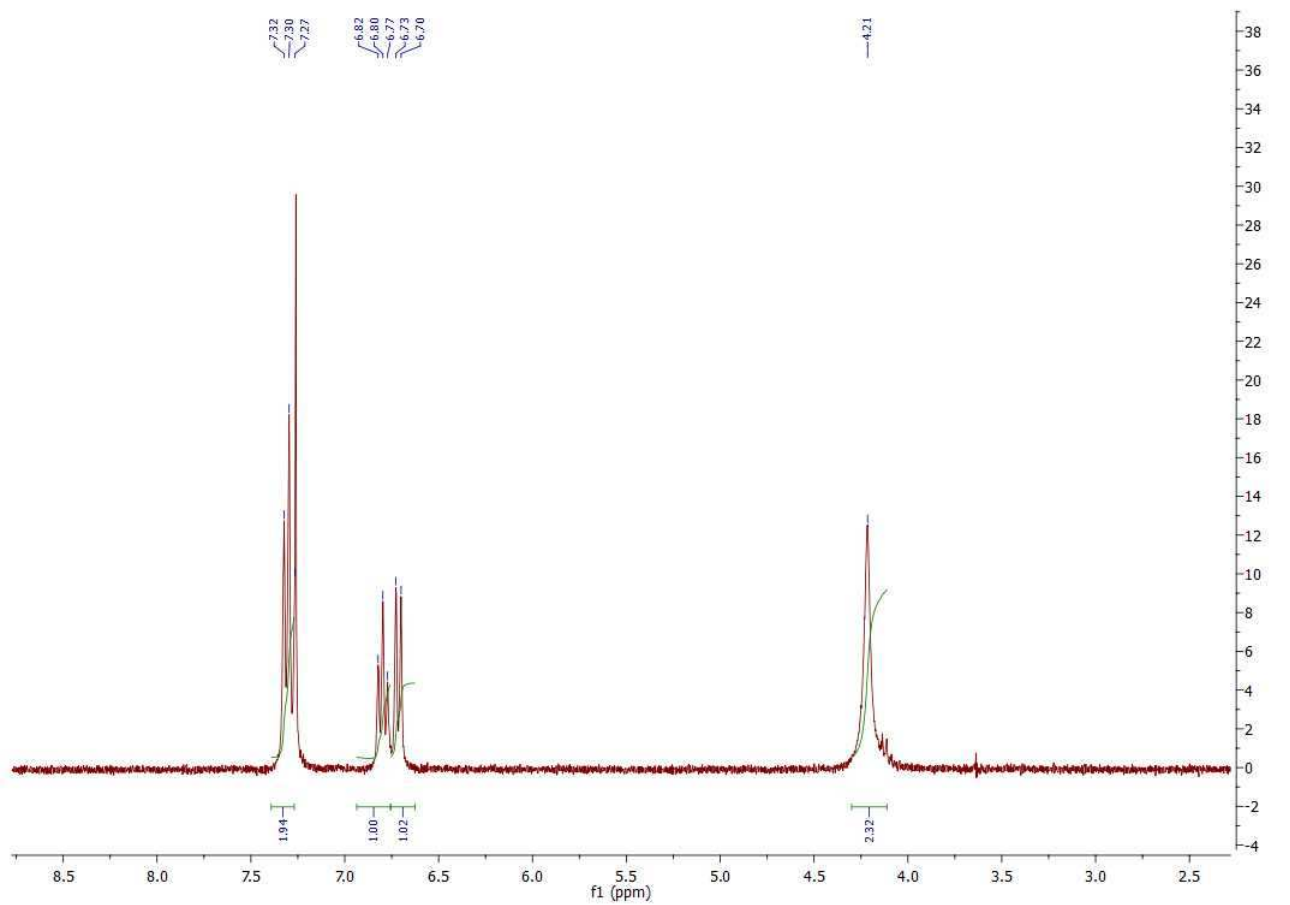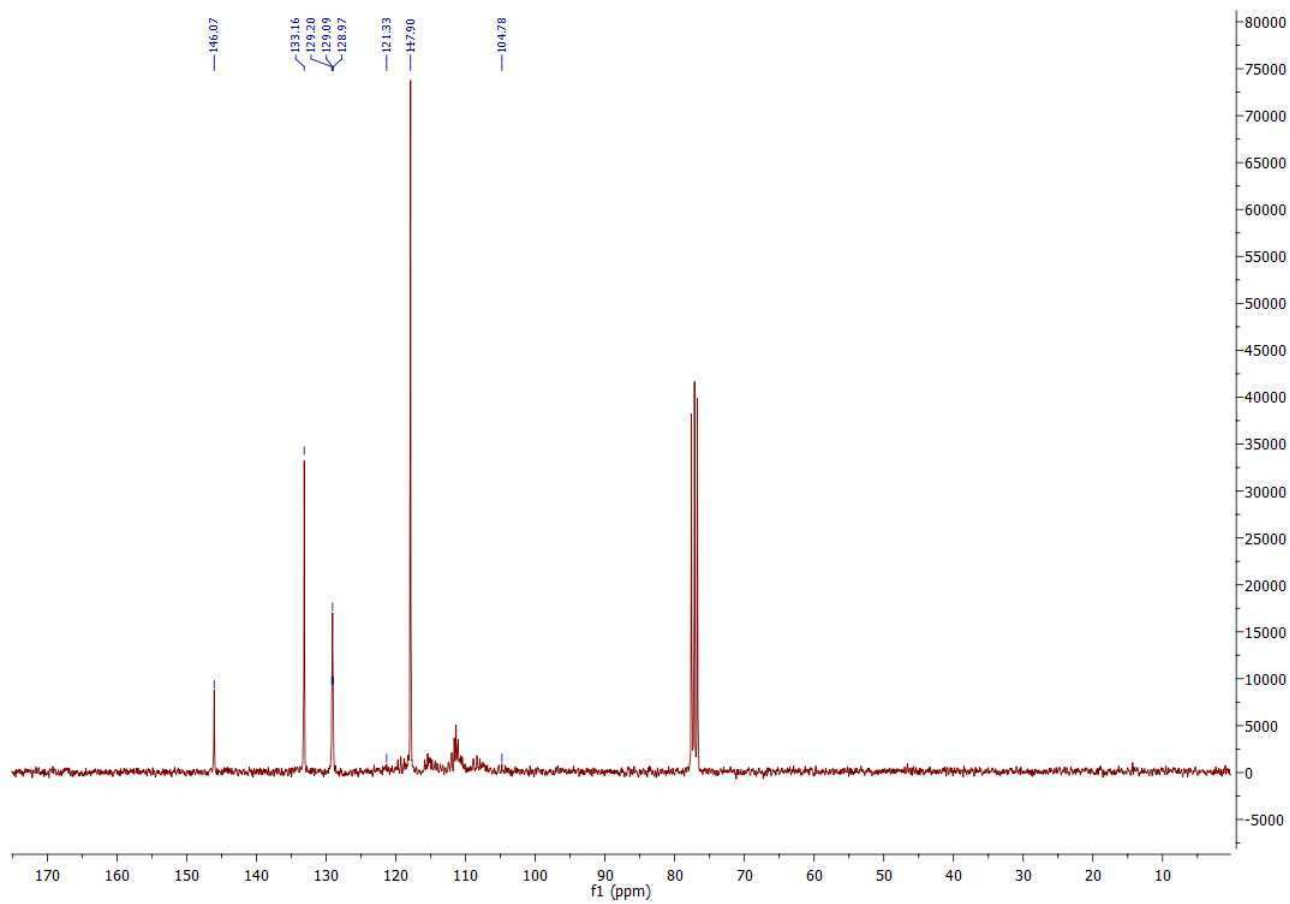

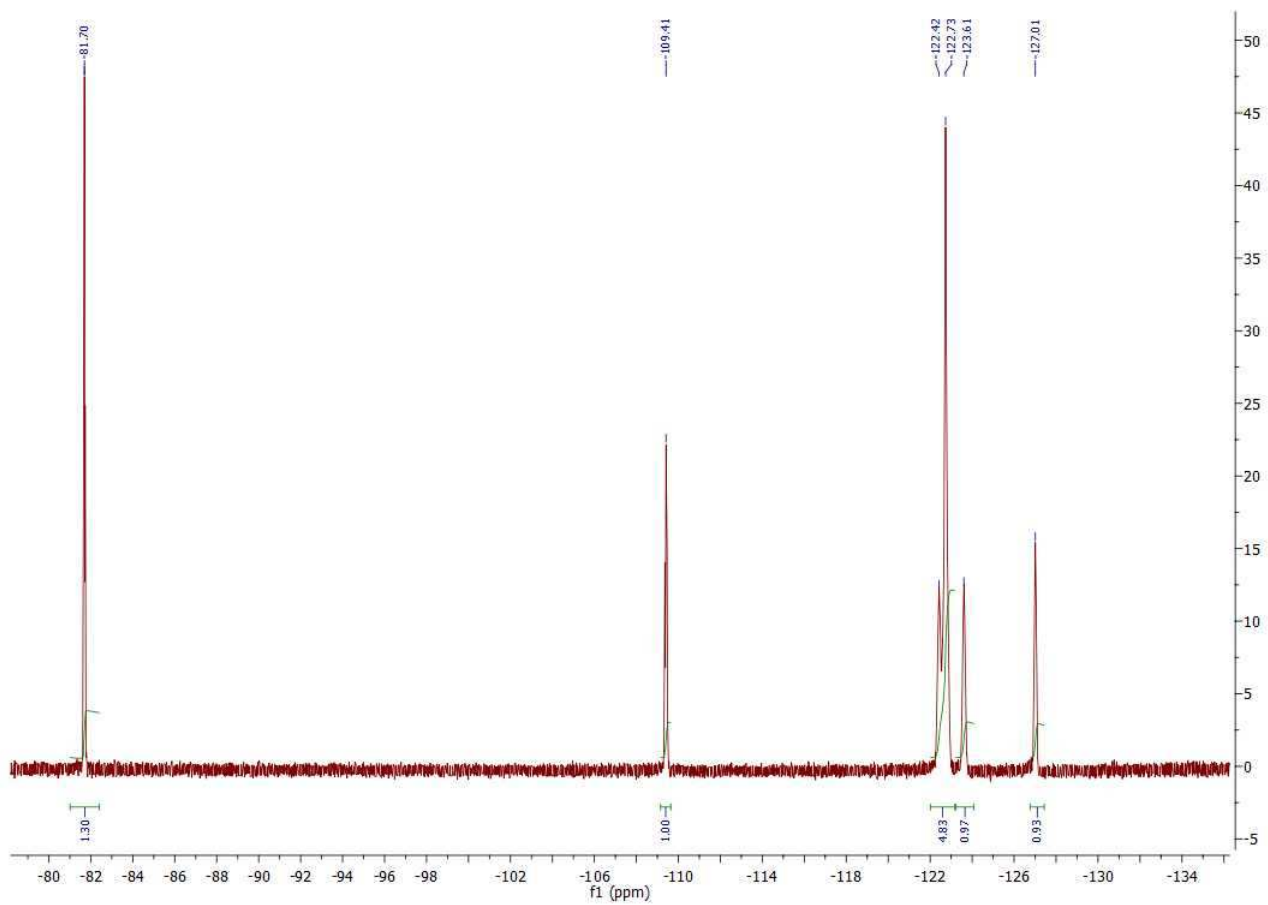

**Isothiocyanato-4-(*n*-perfluorooctyl)benzene (8):**

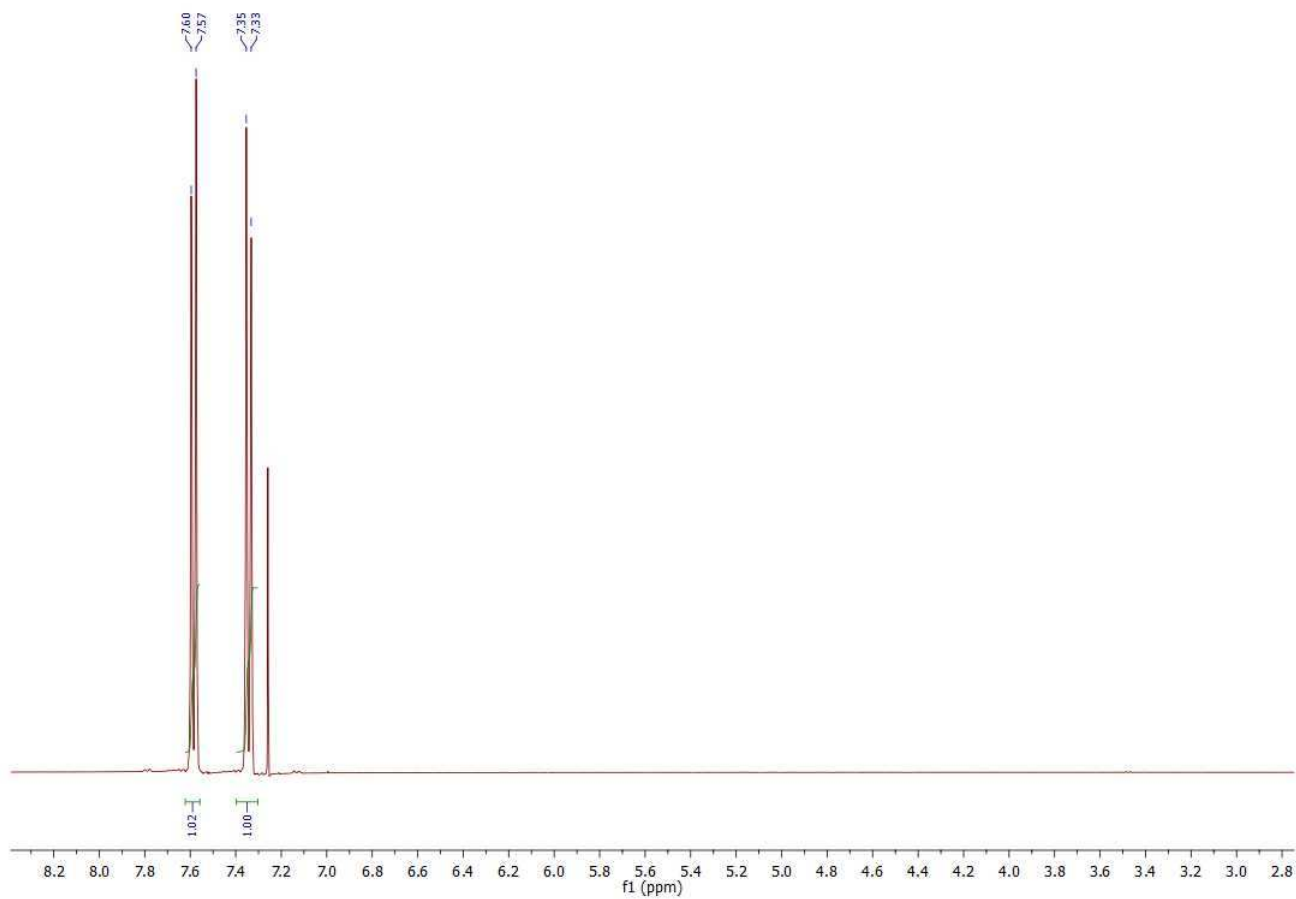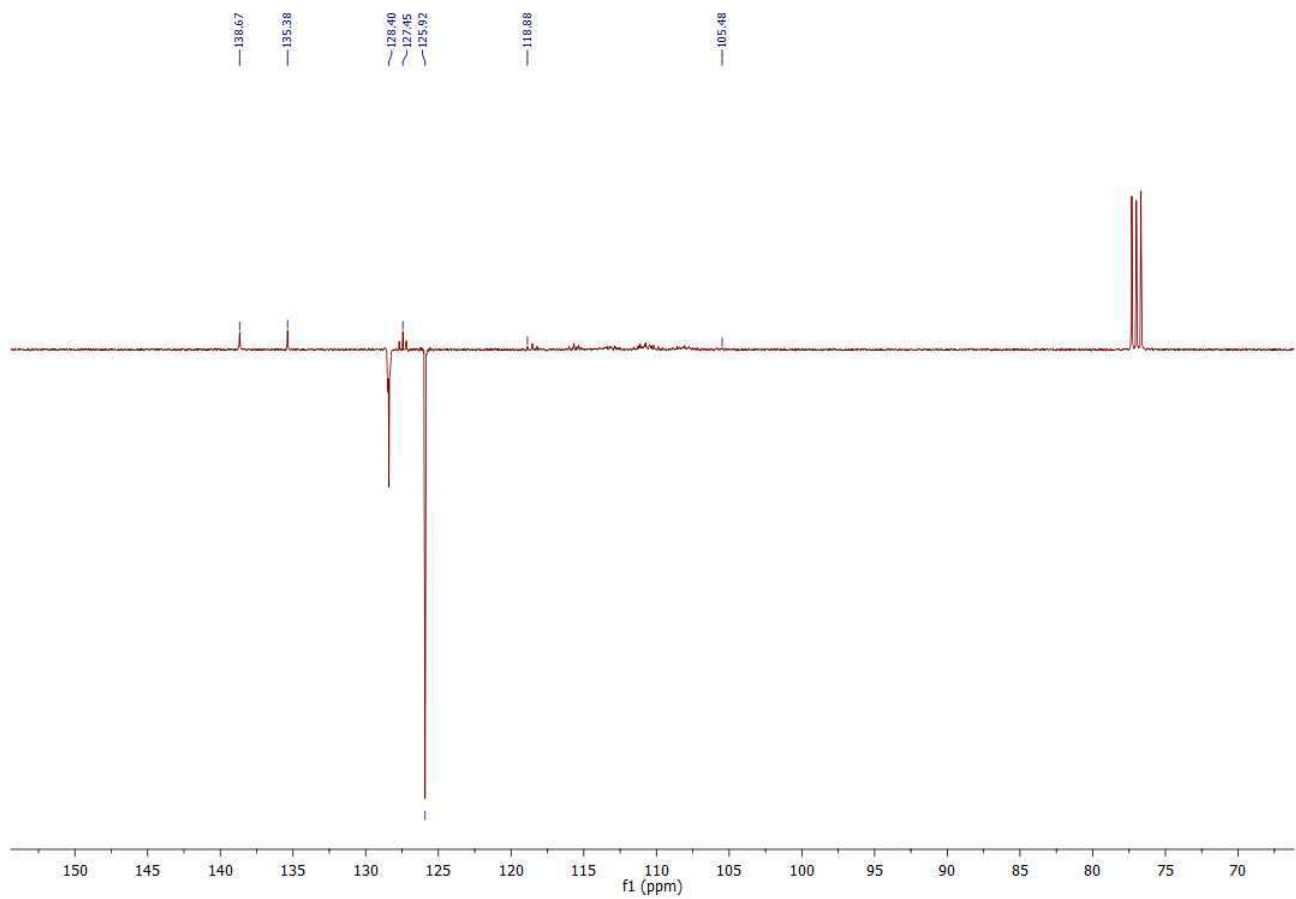



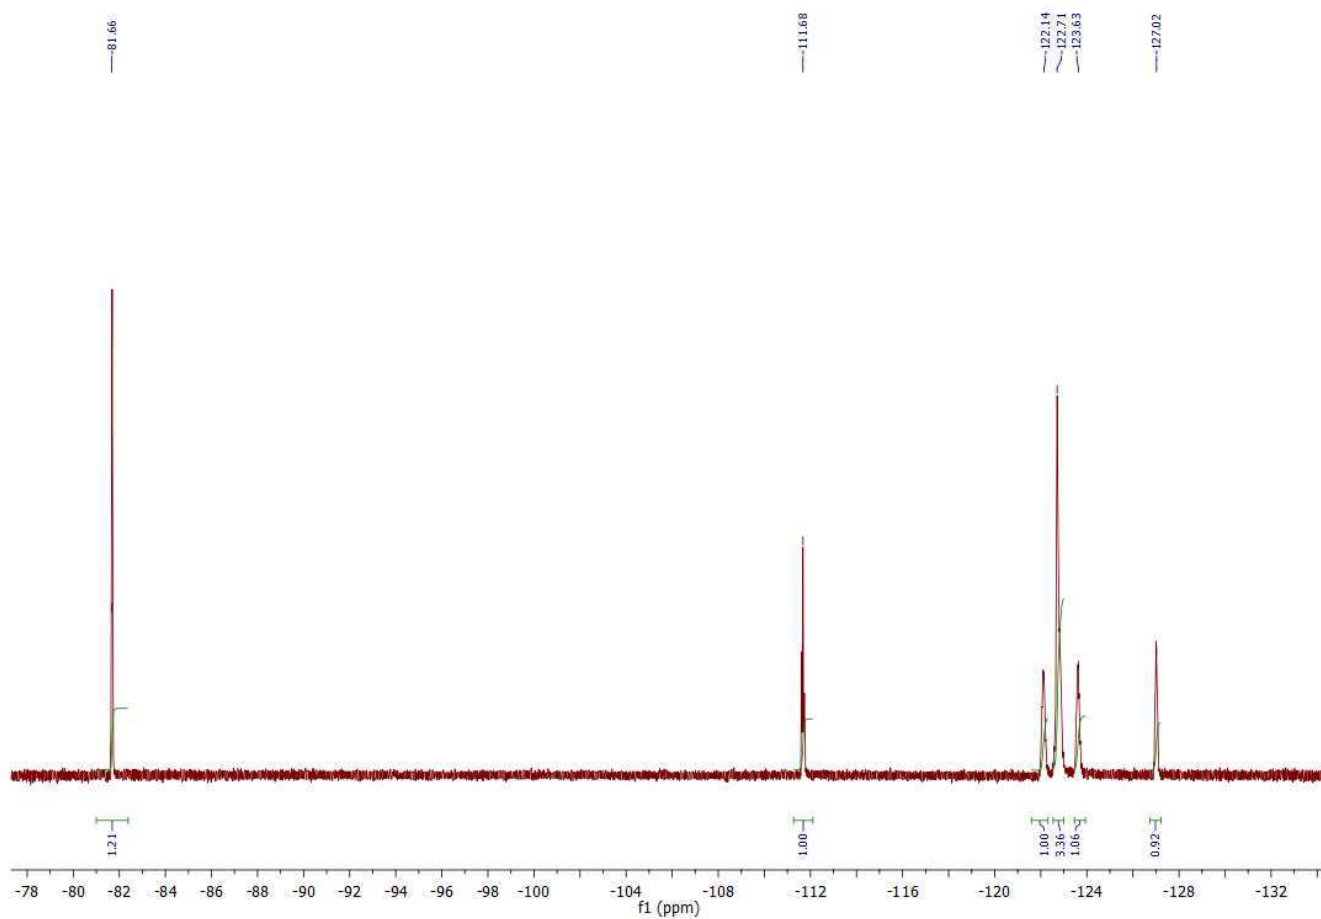

**Isothiocyanato-3-(*n*-perfluorooctyl)benzene (9):**

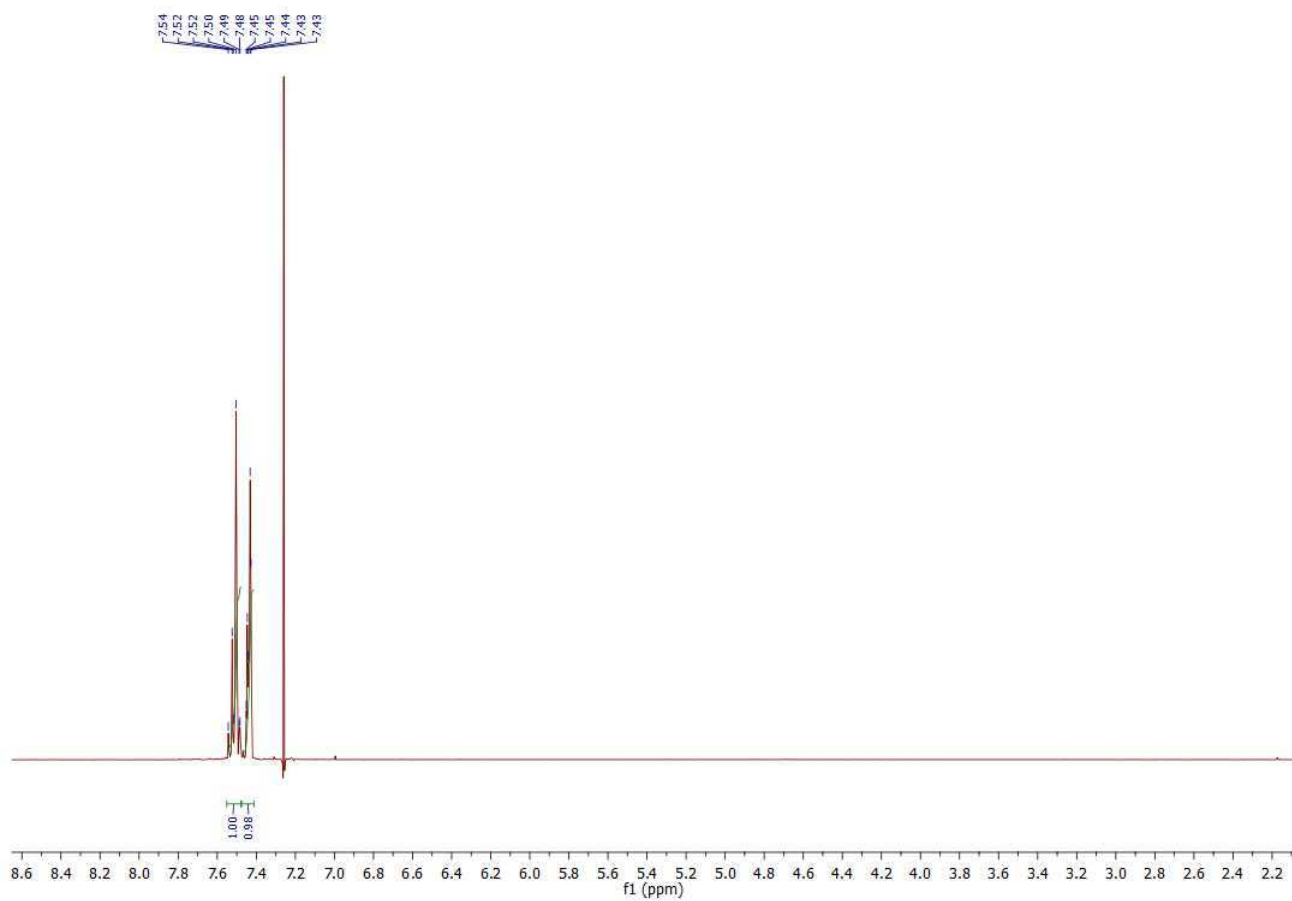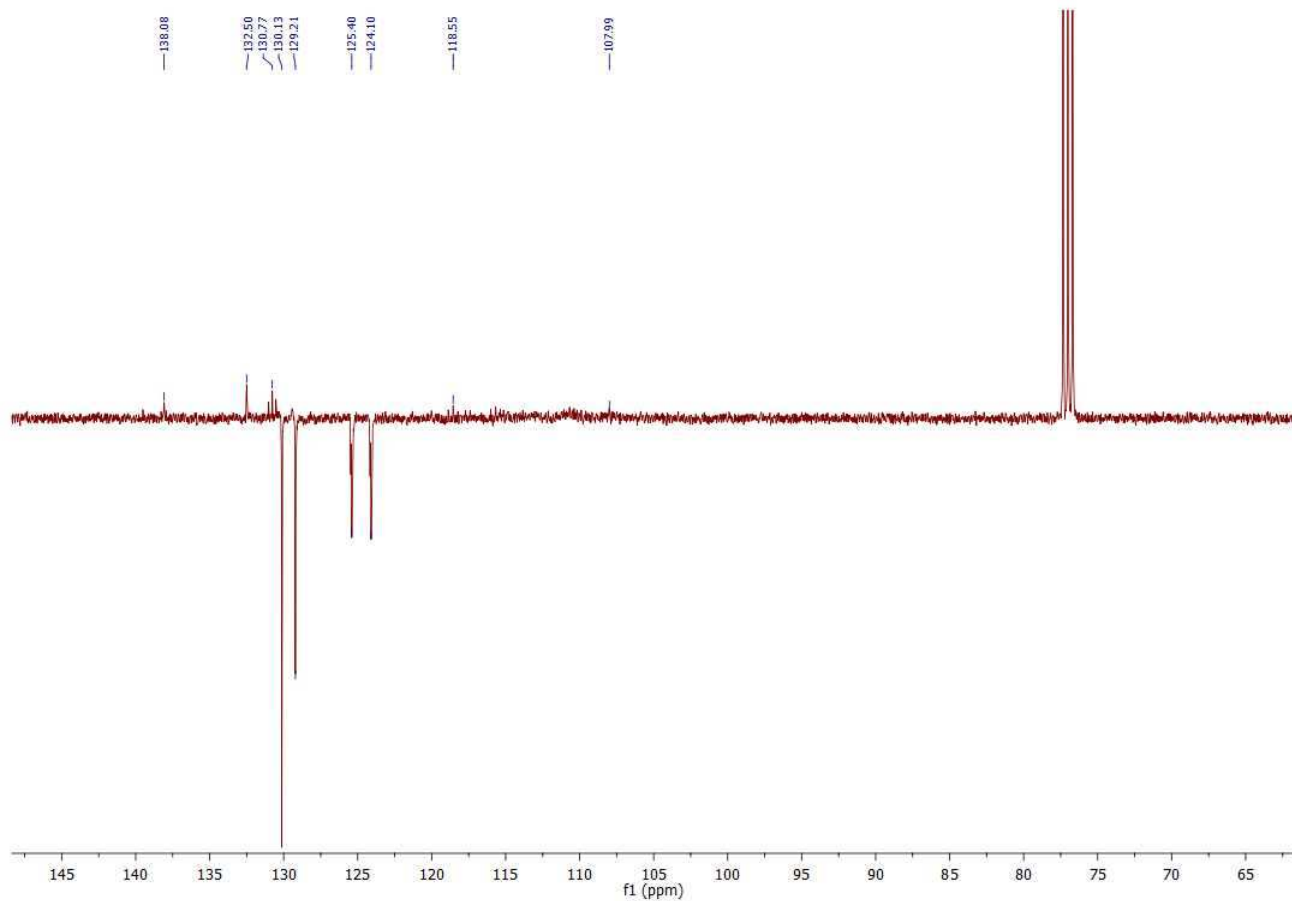

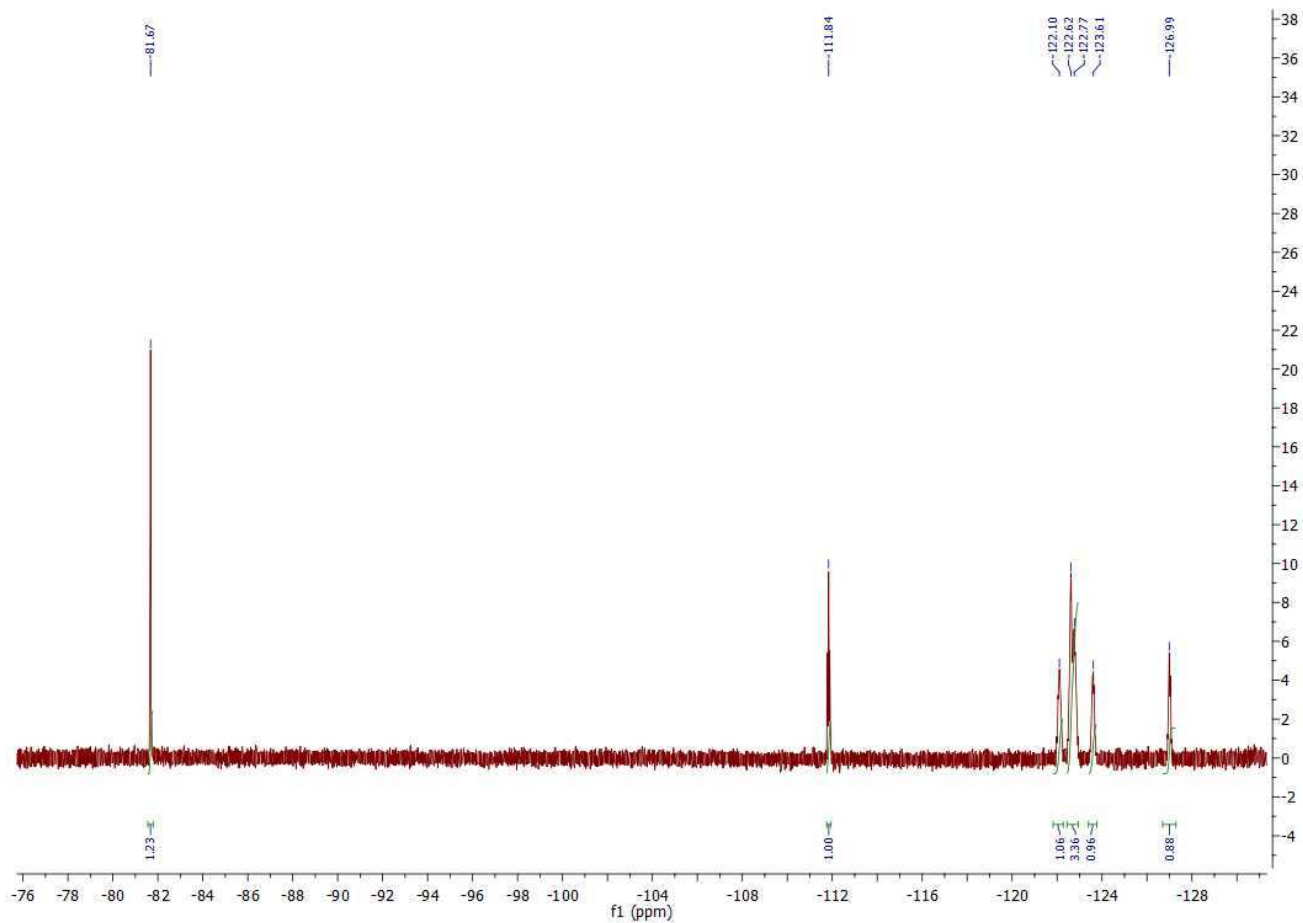

**Isothiocyanato-2-(*n*-perfluorooctyl)benzene (10):**

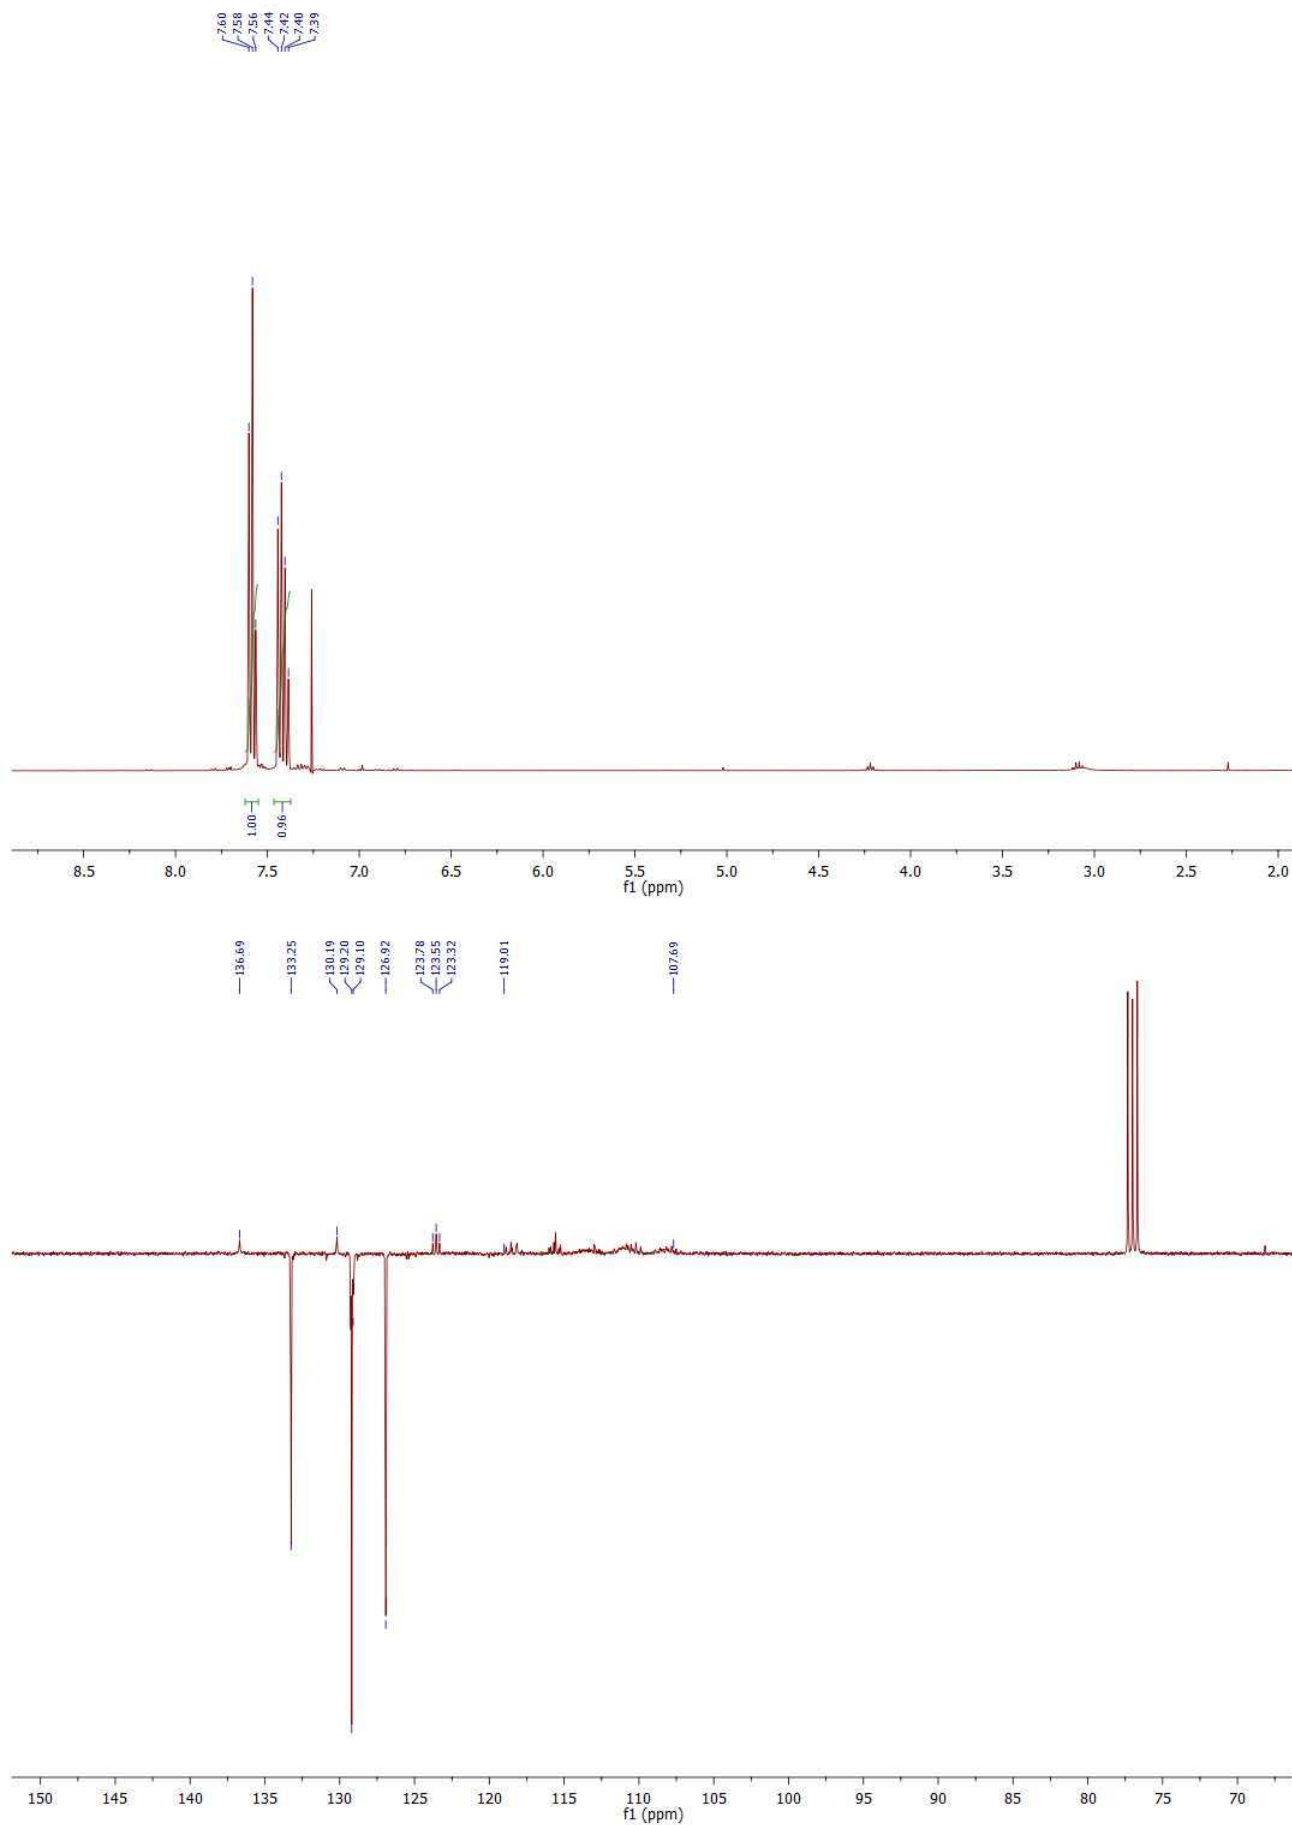

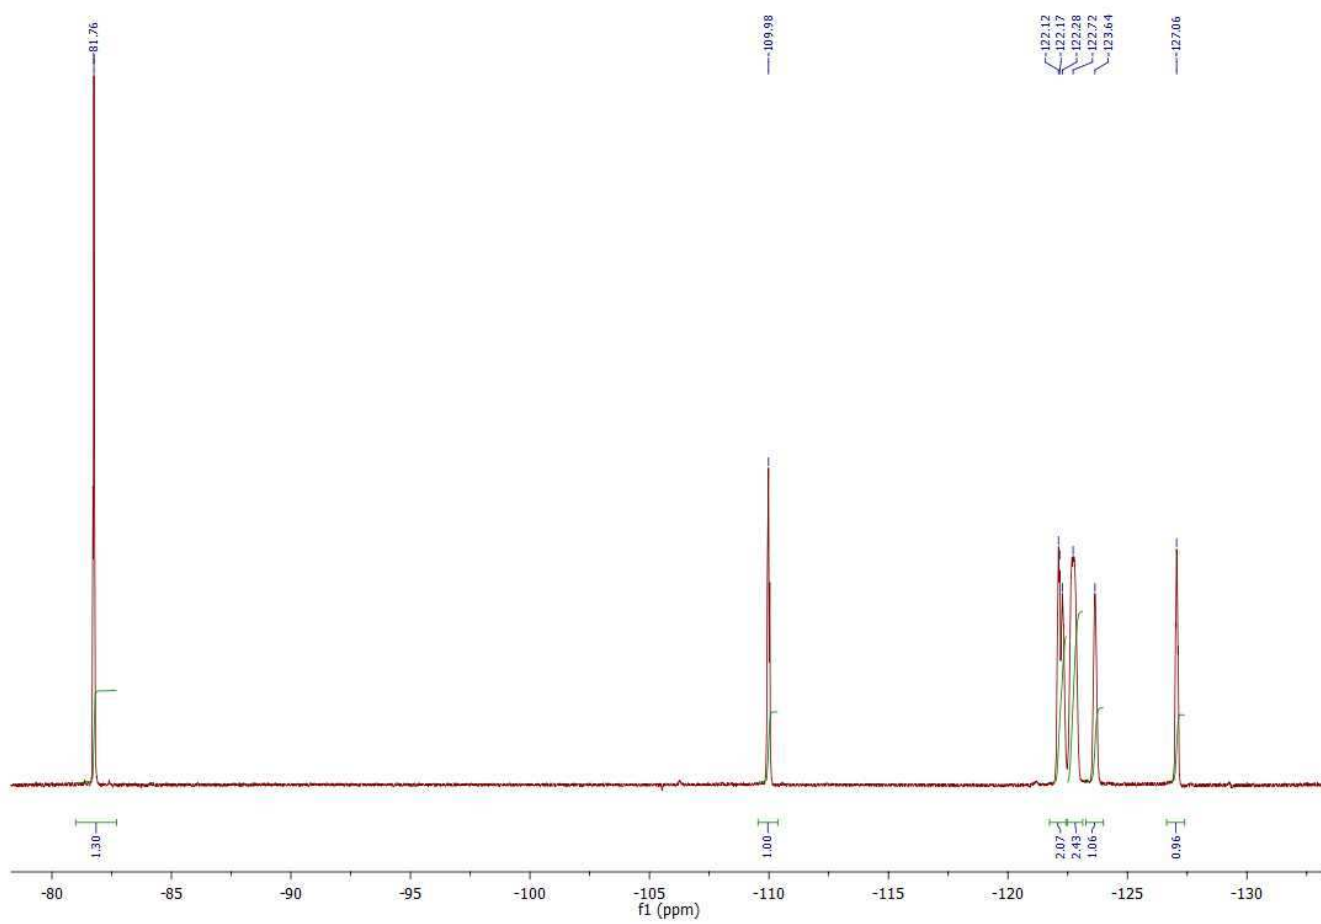

**1-[(1*R*,2*R*)-2-Aminocyclohexyl]-3-[4-(*n*-Perfluorooctyl)phenyl]thiourea (1):**

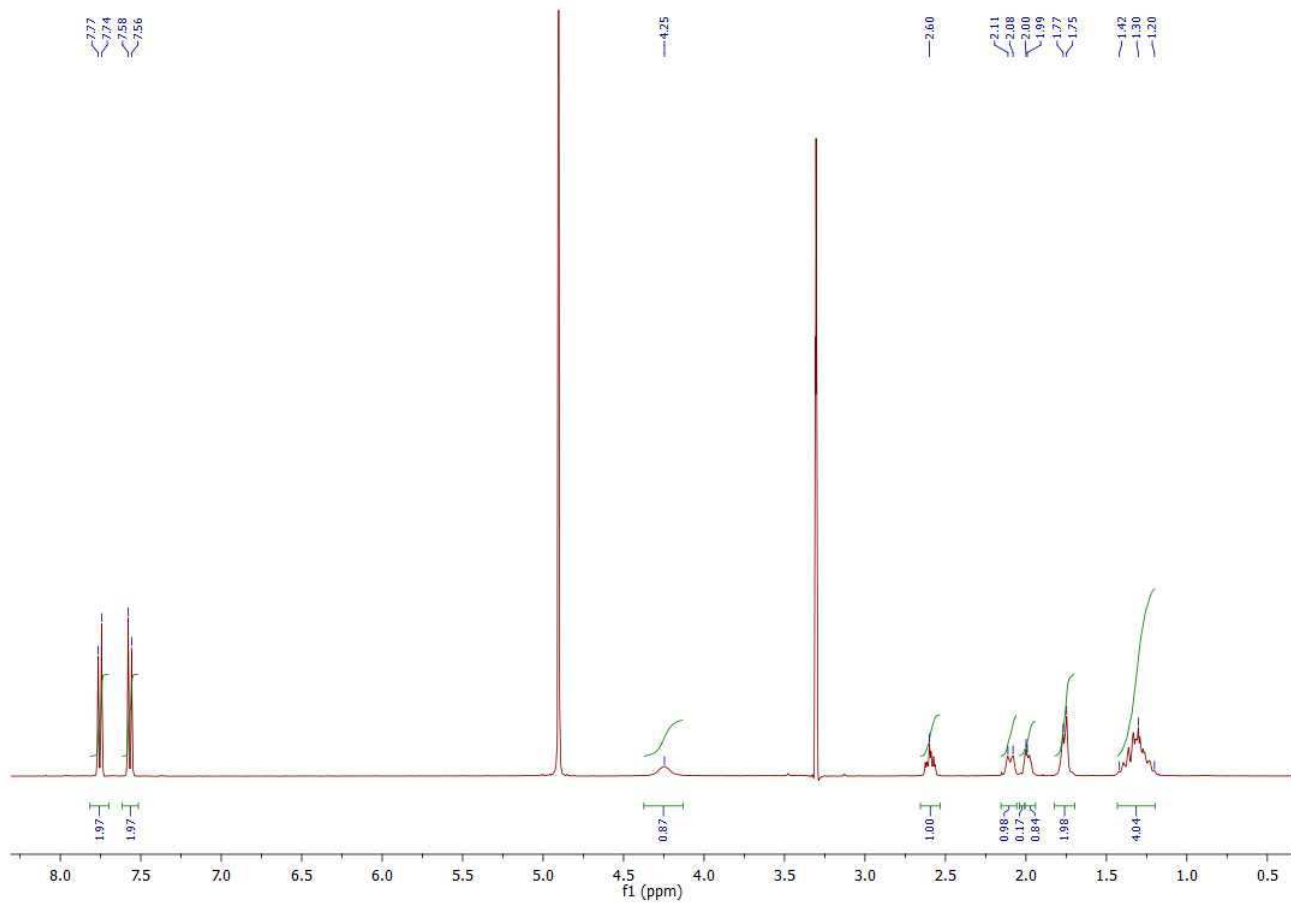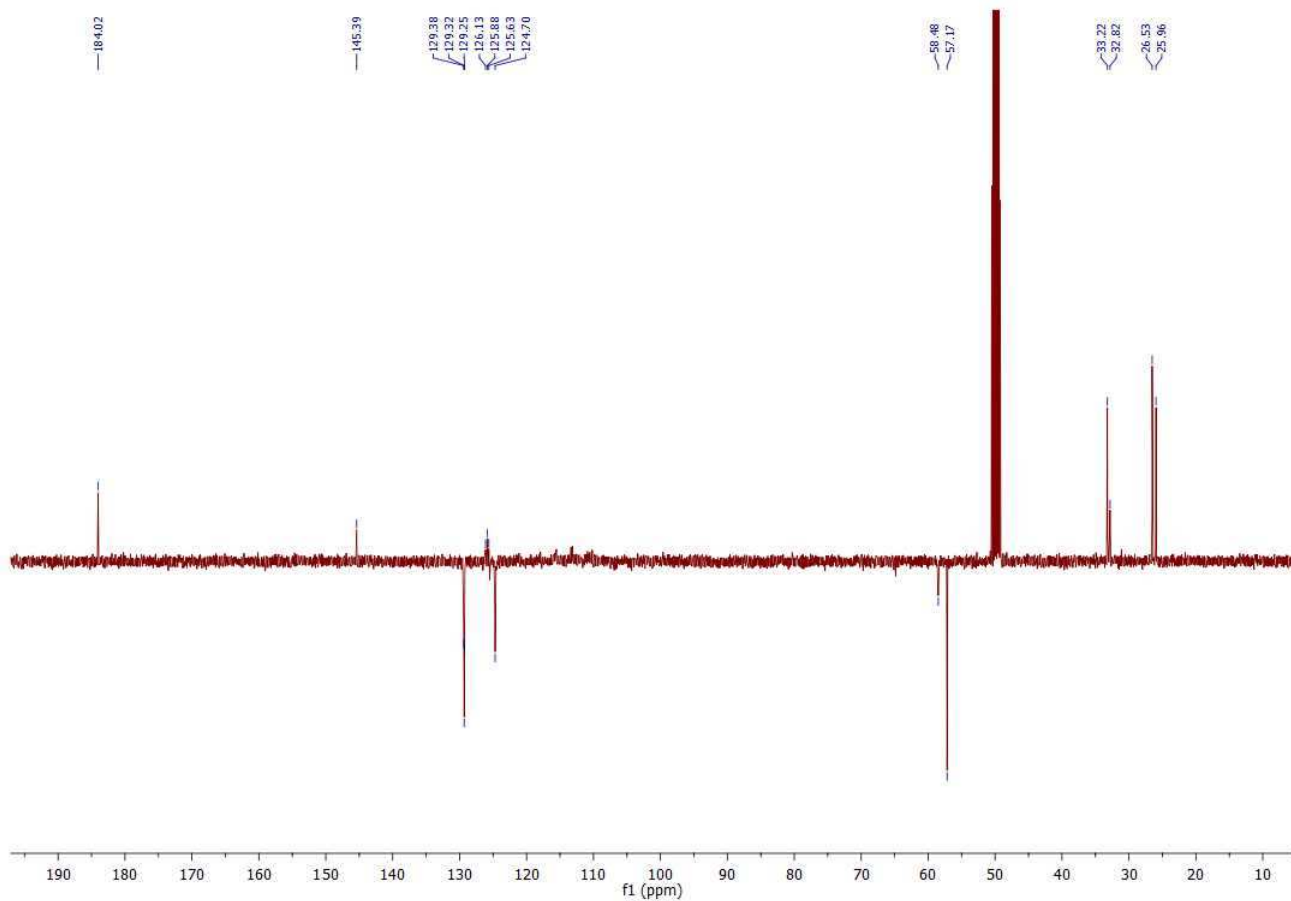

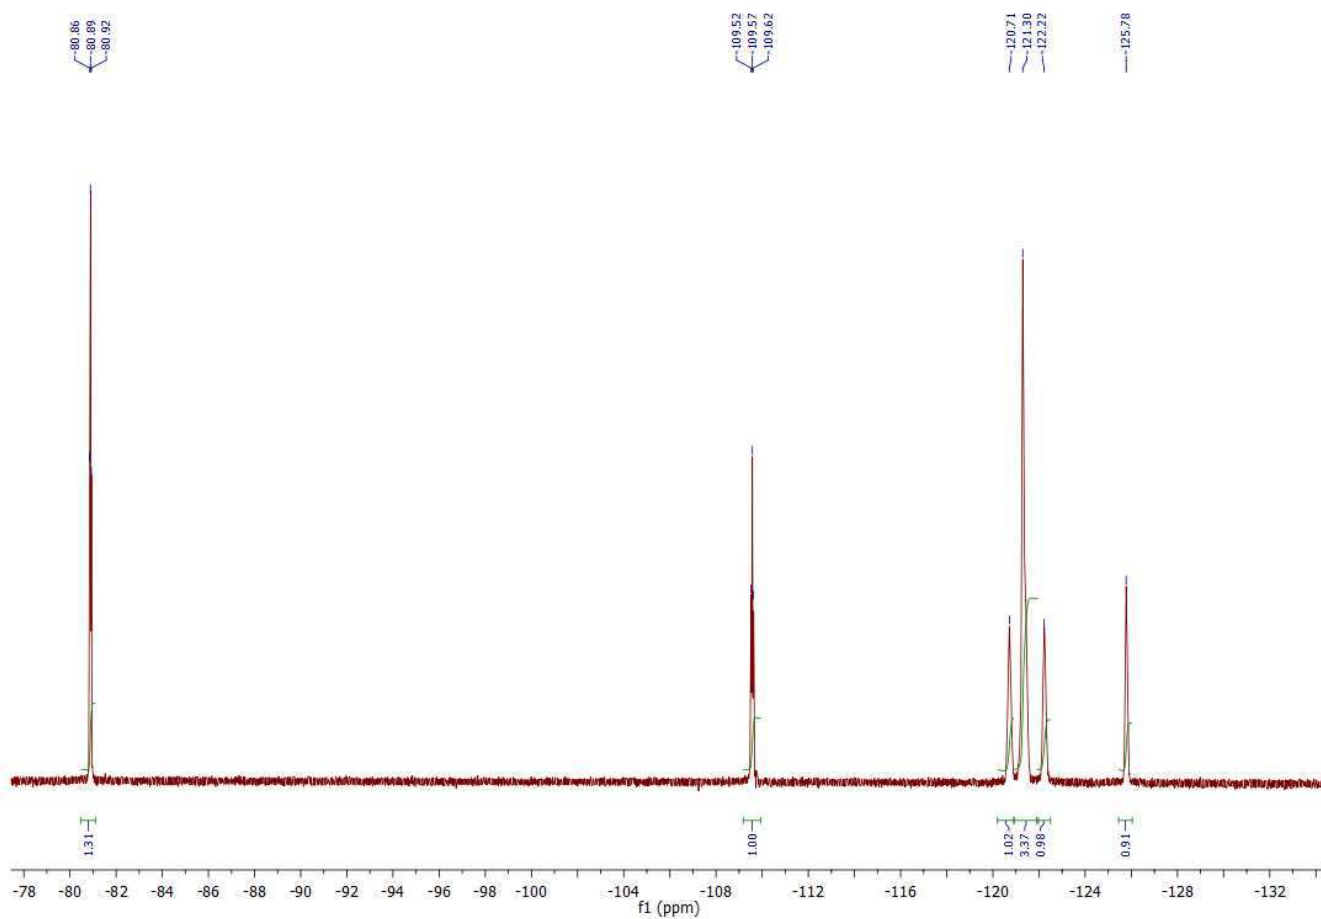

**1-[(1*R*,2*R*)-2-Aminocyclohexyl]-3-[3-(*n*-Perfluorooctyl)phenyl]thiourea (2):**

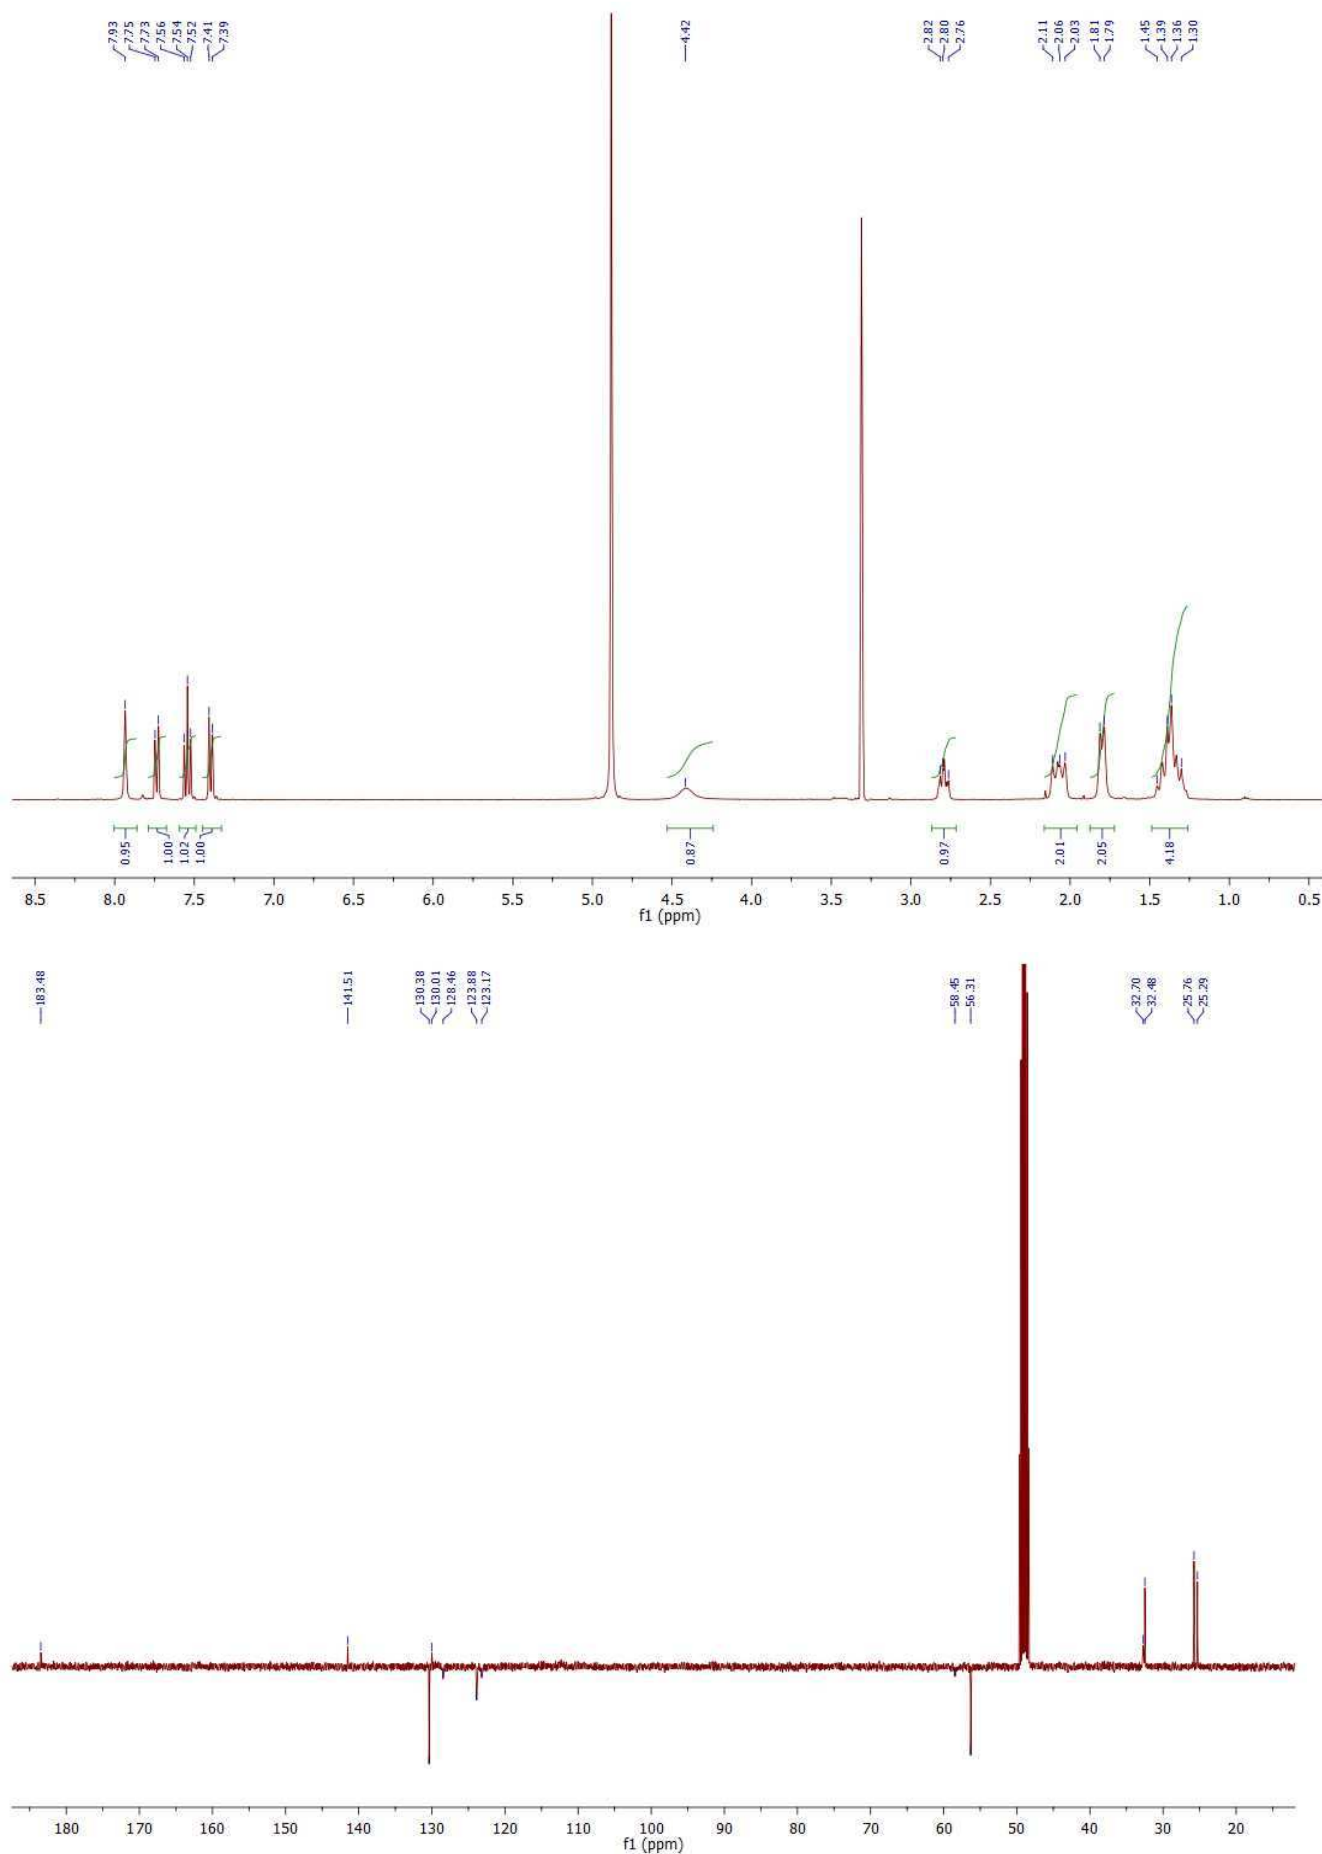



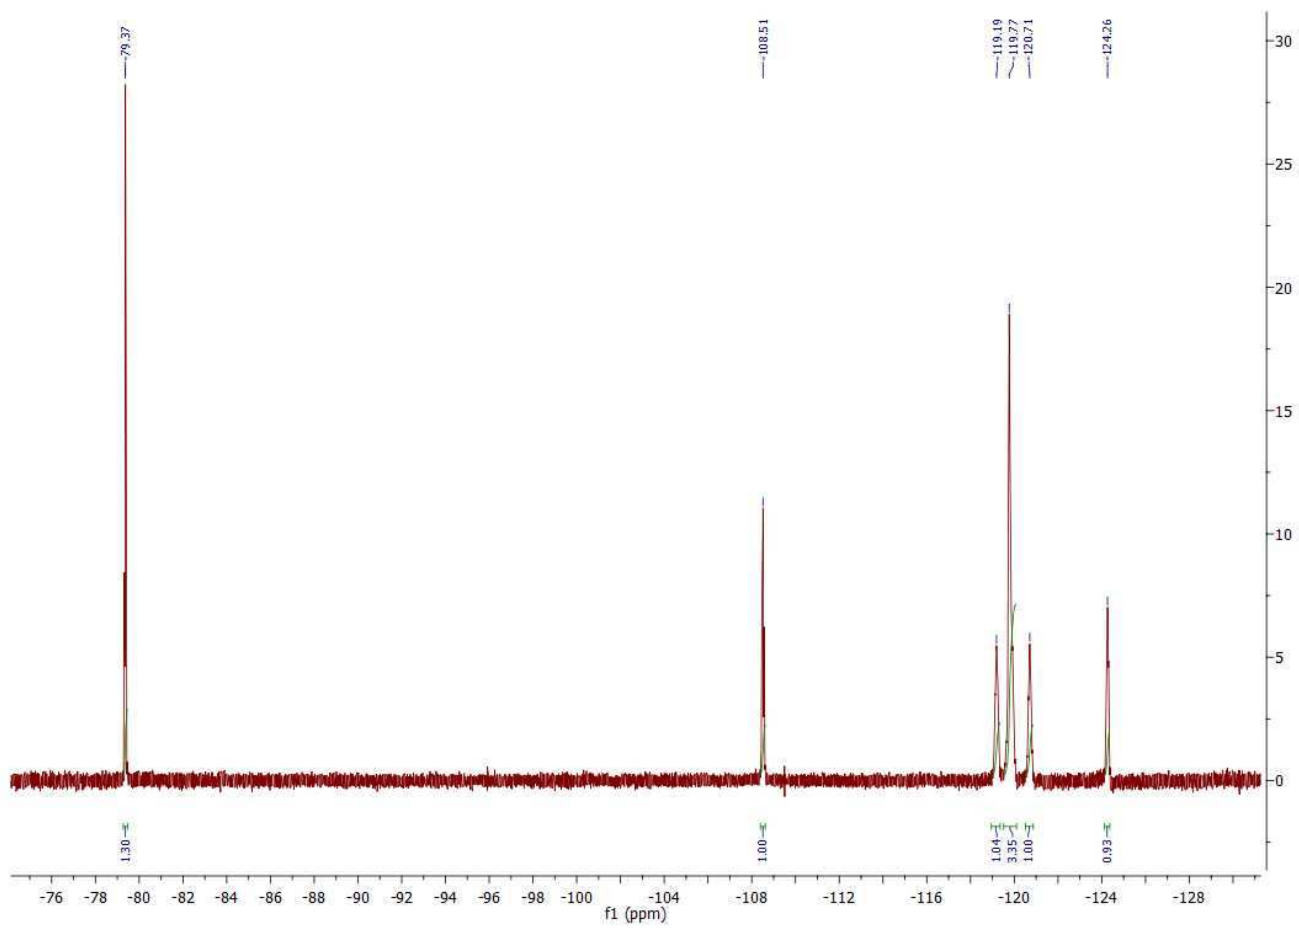

1-[(1*R*,2*R*)-2-Aminocyclohexyl]-3-[2-(*n*-Perfluorooctyl)phenyl]thiourea (3):

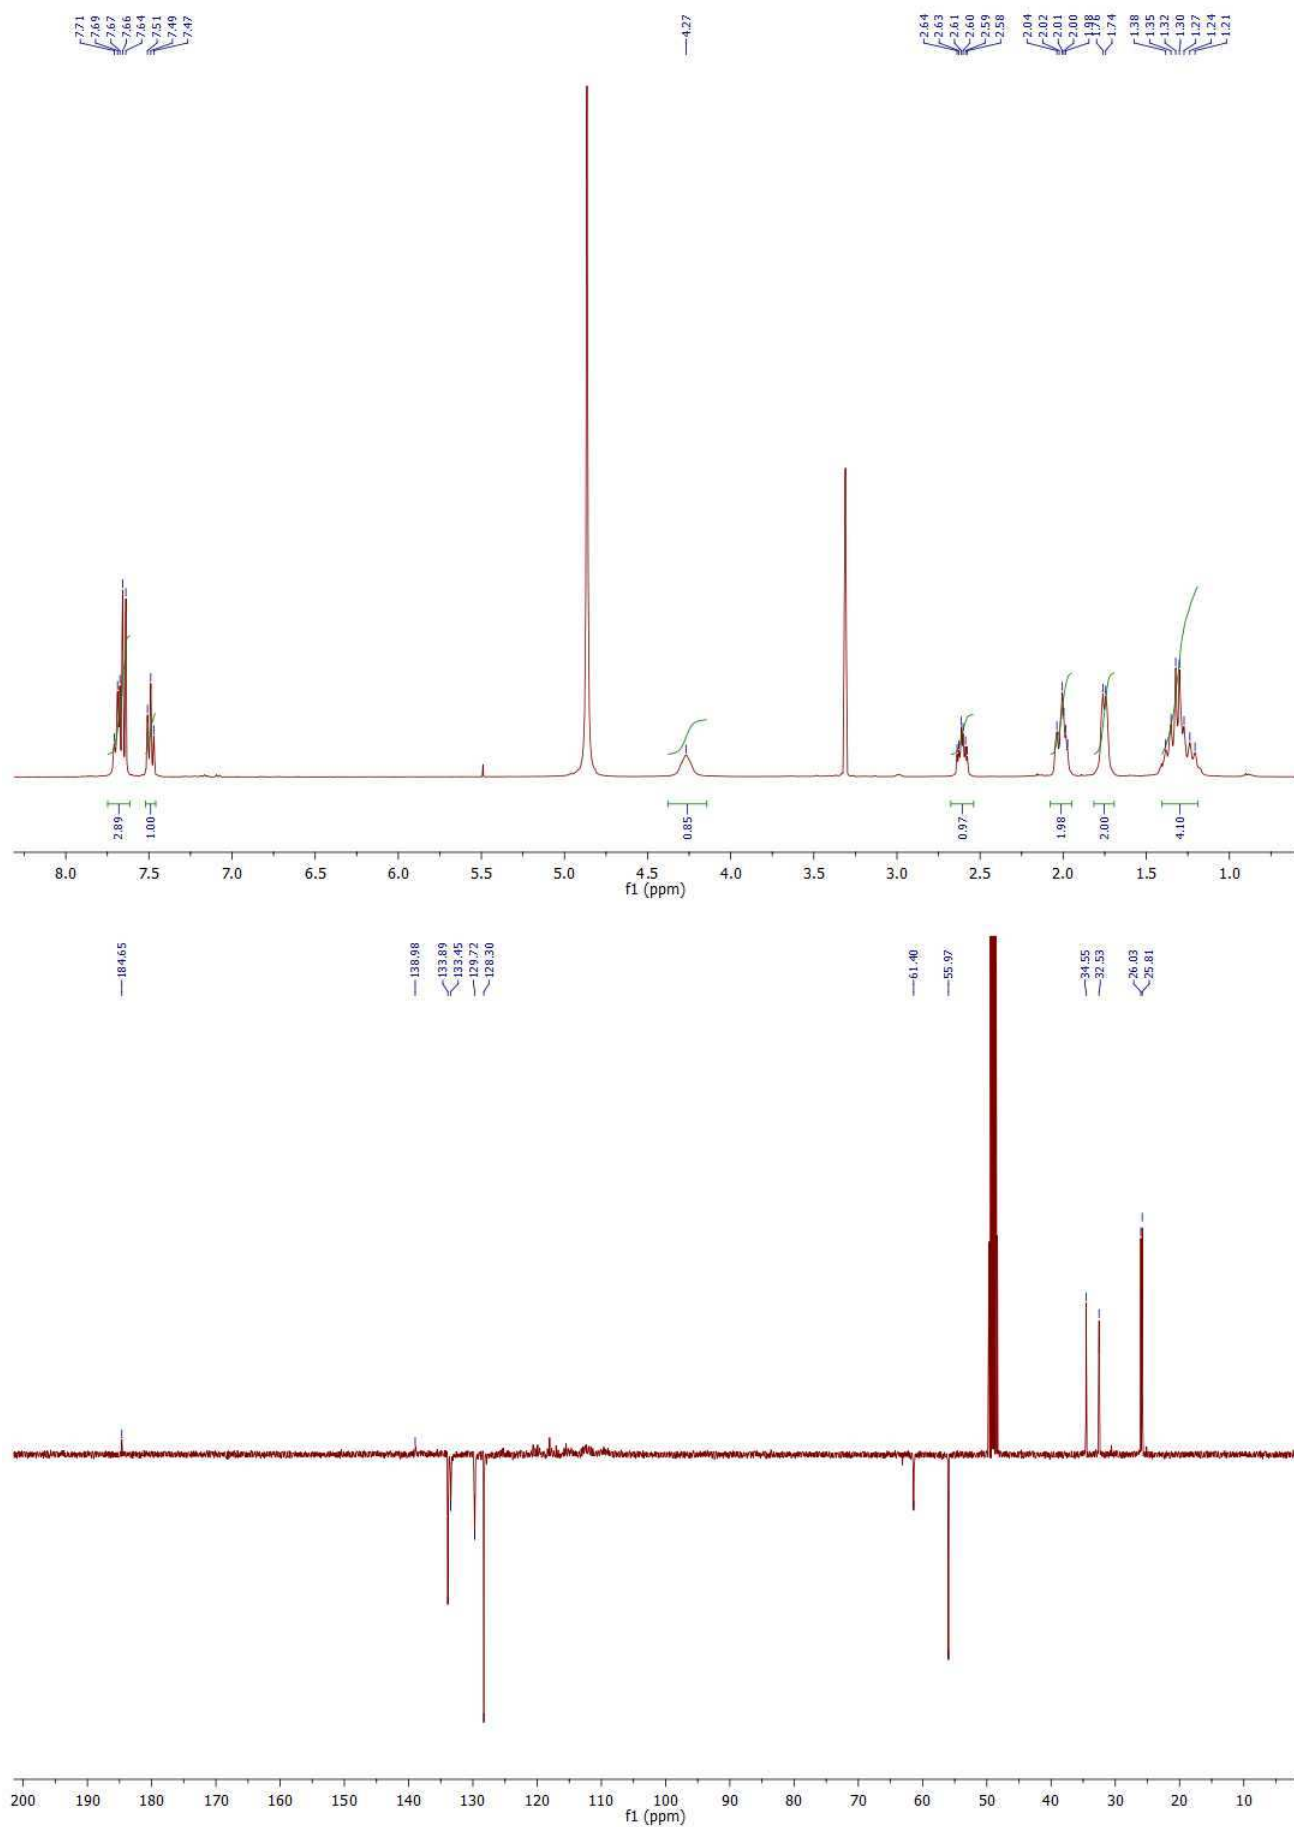

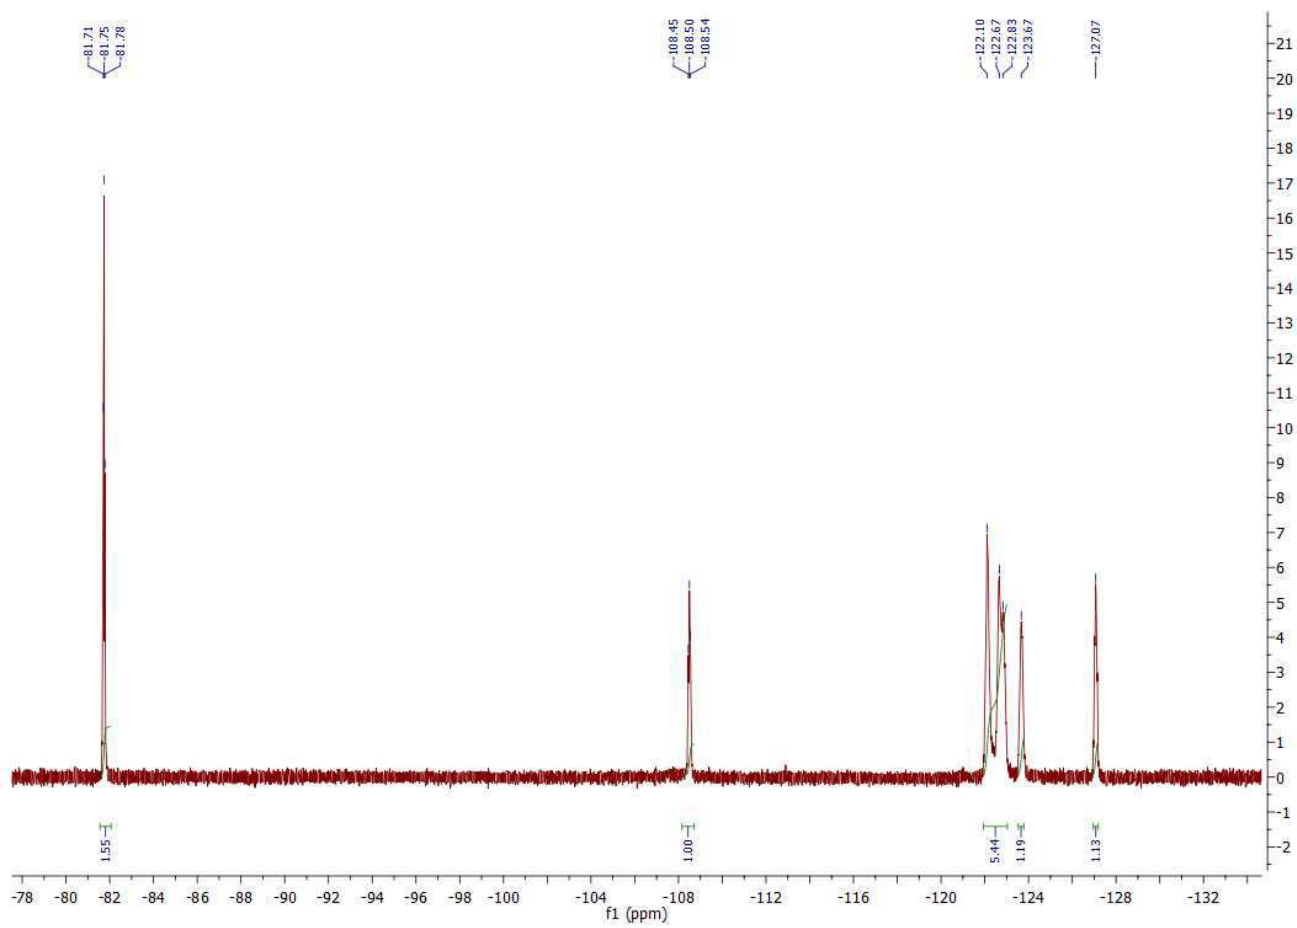

**Michael addition of aldehydes to *N*-substituted maleimides.**

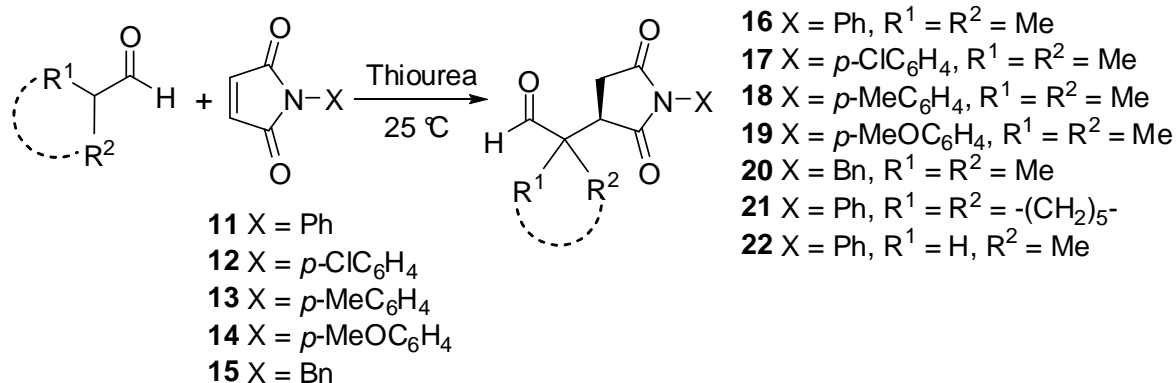

*N*-substituted maleimides **11**,<sup>[1]</sup> **12-14**,<sup>[2]</sup> **15**<sup>[3]</sup> were synthesized as described in the literature. Reaction products **16-22** are known compounds and their spectroscopic data were in full agreement with those reported in the literature.<sup>[4,5]</sup> For compounds **16-21** configuration of the major enantiomer obtained was established by comparison of measured HPLC retention times and optical rotations with those reported in the literature. Compound **22** was obtained as a mixture of diastereomers in a 1.4/1 ratio as evaluated by <sup>1</sup>H NMR analysis of the crude reaction product. In this case, configurations of the major enantiomers obtained were not established. HPLC conditions are here reported:

**2-(2,5-Dioxo-1-phenylpyrrolidin-3-yl)-2-methylpropanal (16)**

OD-H column, 225 nm, Hexane/2-Propanol = 75:25, flow rate = 1 mL\*min<sup>-1</sup>.

*Racemic mixture*

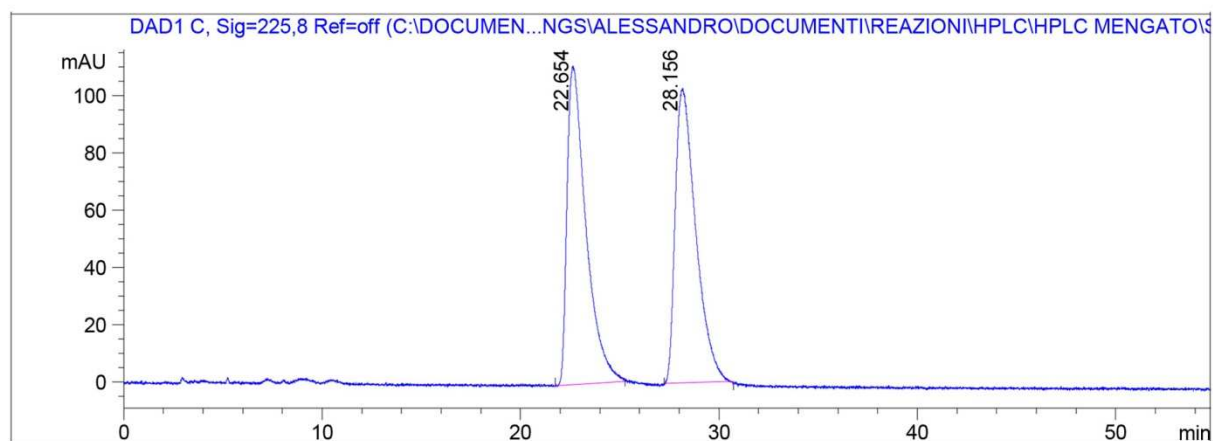

| Peak # | RT [min] | Type | Width [min] | Area     | Area % | Name |
|--------|----------|------|-------------|----------|--------|------|
| 1      | 22.654   | MM   | 1.101       | 7358.084 | 49.891 |      |
| 2      | 28.156   | MM   | 1.196       | 7390.351 | 50.109 |      |

*Catalyst 4 (Table 2, entry 1)*

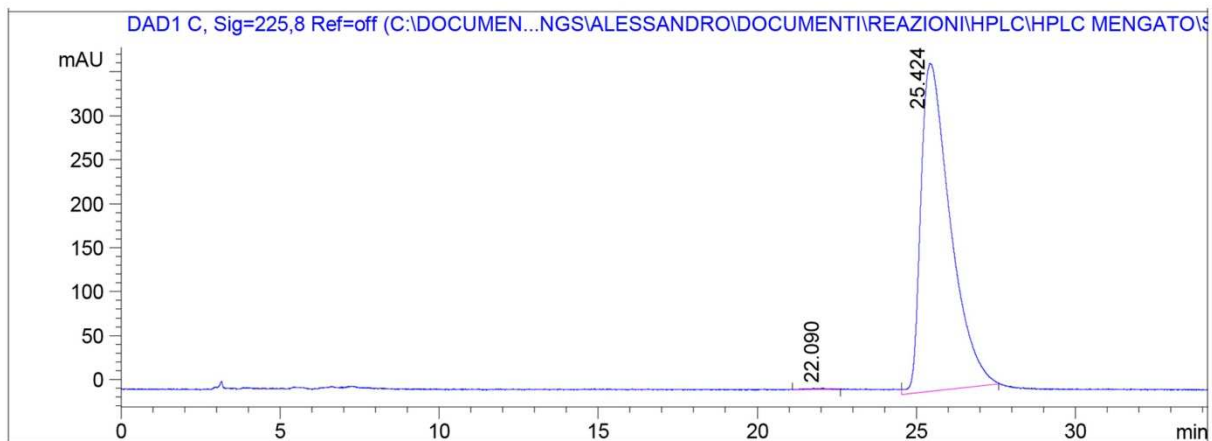

| Peak # | RT [min] | Type | Width [min] | Area      | Area % | Name |
|--------|----------|------|-------------|-----------|--------|------|
| 1      | 22.090   | MM   | 0.448       | 39.901    | 0.166  |      |
| 2      | 25.424   | MM   | 1.072       | 24008.732 | 99.834 |      |

*Catalyst 1 (Table 2, entry 2)*

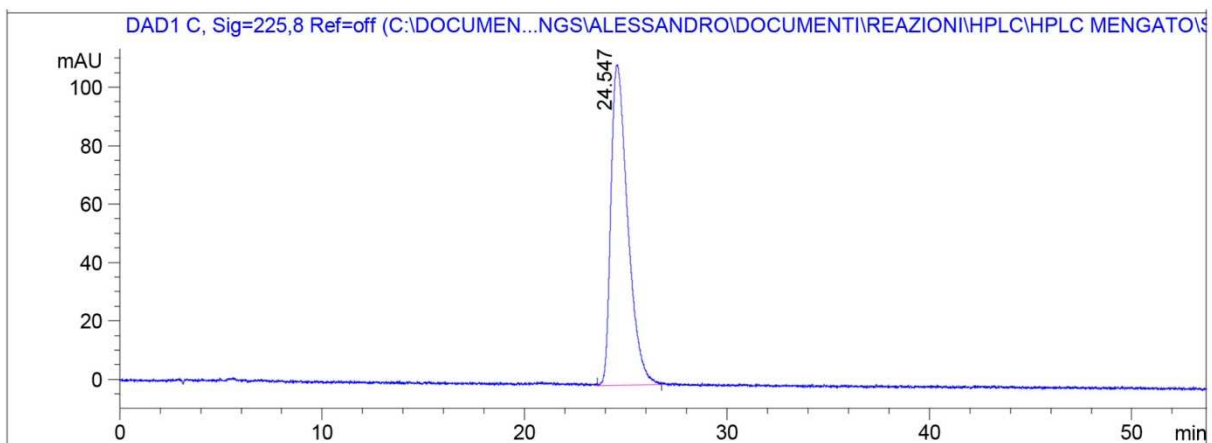

| Peak # | RT [min] | Type | Width [min] | Area     | Area %  | Name |
|--------|----------|------|-------------|----------|---------|------|
| 1      | 24.547   | MM   | 0.963       | 6348.832 | 100.000 |      |

*Catalyst 2 (Table 2, entry 3)*

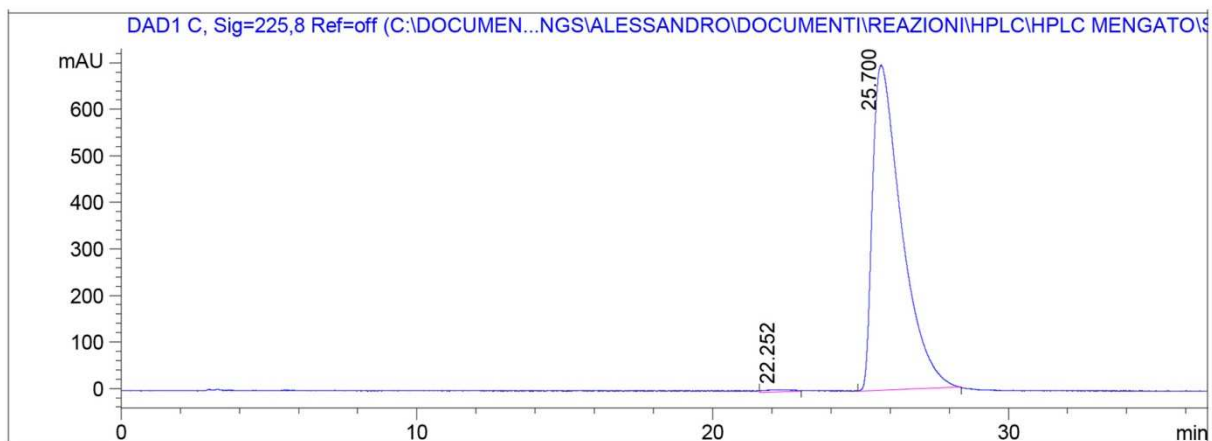

| Peak # | RT [min] | Type | Width [min] | Area      | Area % | Name |
|--------|----------|------|-------------|-----------|--------|------|
| 1      | 22.252   | MM   | 0.989       | 279.155   | 0.583  |      |
| 2      | 25.700   | MM   | 1.135       | 47629.547 | 99.417 |      |

*Catalyst 3 (Table 2, entry 4)*

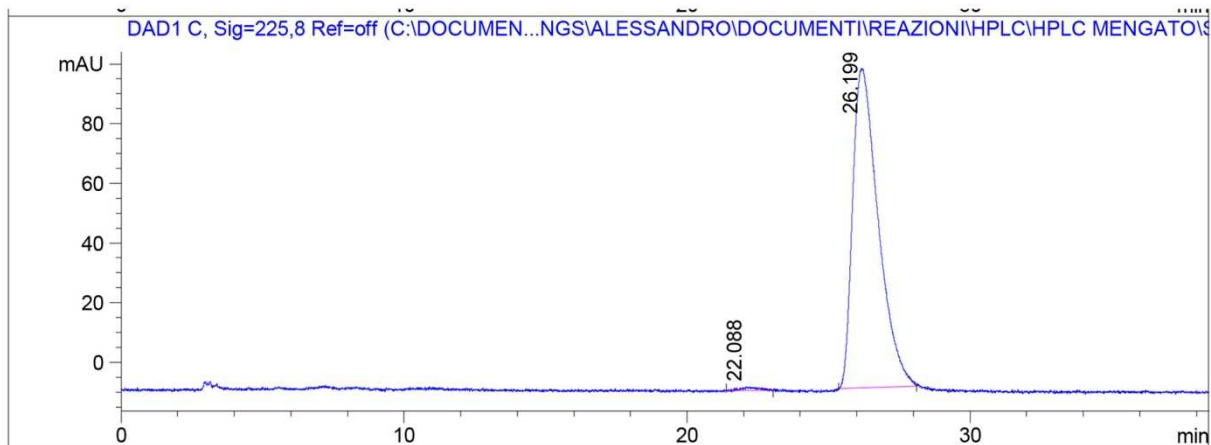

| Peak # | RT [min] | Type | Width [min] | Area     | Area % | Name |
|--------|----------|------|-------------|----------|--------|------|
| 1      | 22.088   | MM   | 0.654       | 52.540   | 0.775  |      |
| 2      | 26.199   | MM   | 1.046       | 6727.118 | 99.225 |      |

**2-(1-(4-Chlorophenyl)-2,5-dioxopyrrolidin-3-yl)-2-methylpropanal (17)**

OD-H column, 225 nm, Hexane/2-Propanol = 75:25, flow rate = 1 mL\*min<sup>-1</sup>.

*Racemic mixture*

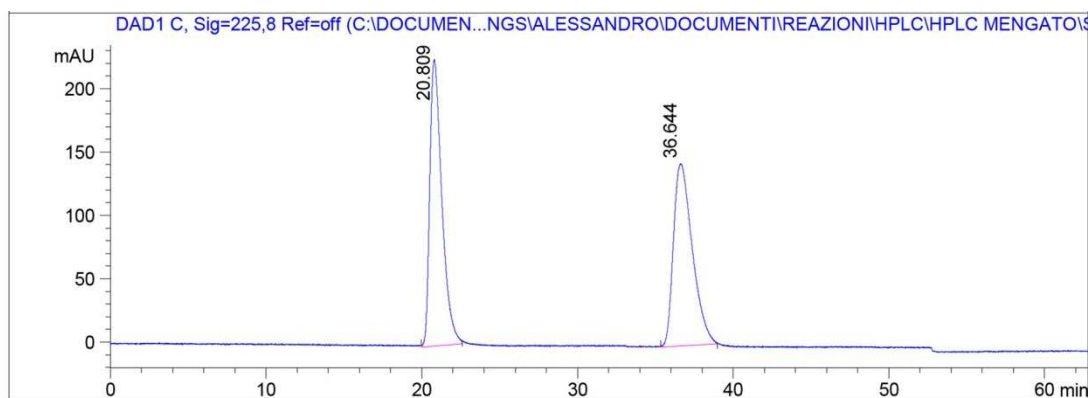

| Peak # | RT [min] | Type | Width [min] | Area      | Area % | Name |
|--------|----------|------|-------------|-----------|--------|------|
| 1      | 20.809   | MM   | 0.897       | 12158.909 | 50.140 |      |
| 2      | 36.644   | MM   | 1.401       | 12090.836 | 49.860 |      |

*Catalyst 1 (Table 3, entry 1)*

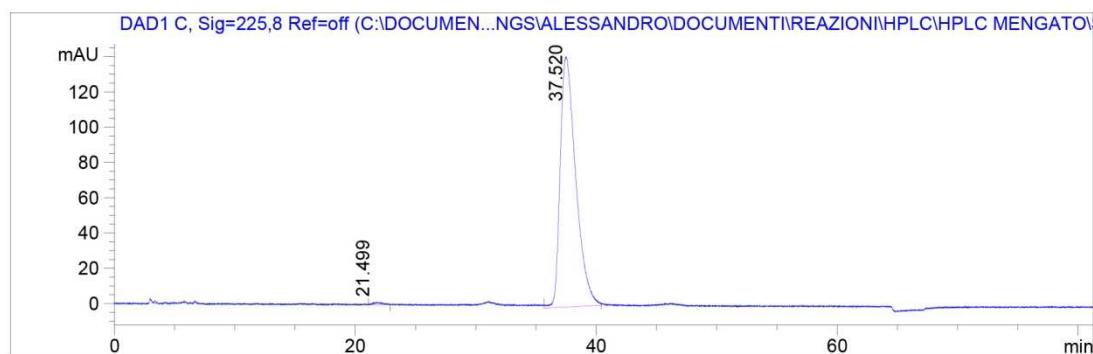

| Peak # | RT [min] | Type | Width [min] | Area      | Area % | Name |
|--------|----------|------|-------------|-----------|--------|------|
| 1      | 21.499   | MM   | 0.702       | 72.311    | 0.564  |      |
| 2      | 37.520   | MM   | 1.496       | 12750.869 | 99.436 |      |

## 2-(2,5-Dioxo-1-p-tolylpyrrolidin-3-yl)-2-methylpropanal (18)

OD-H column, 225 nm, Hexane/2-Propanol = 75:25, flow rate = 1 mL\*min<sup>-1</sup>.

Racemic mixture

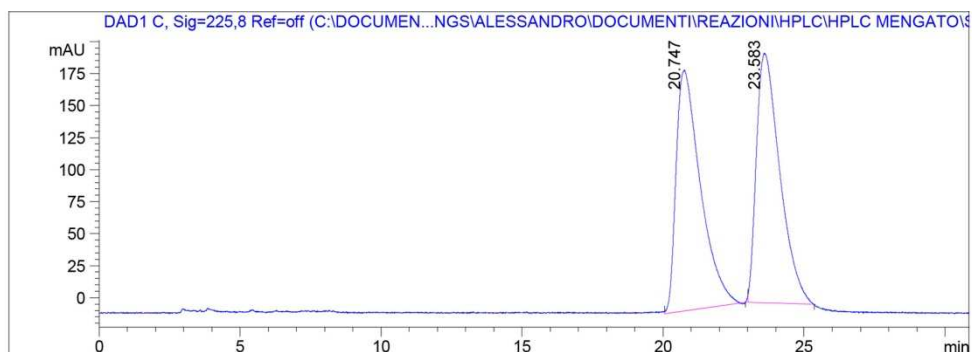

| Peak # | RT [min] | Type | Width [min] | Area      | Area % | Name |
|--------|----------|------|-------------|-----------|--------|------|
| 1      | 20.747   | MM   | 1.000       | 11303.103 | 50.091 |      |
| 2      | 23.583   | MM   | 0.963       | 11262.214 | 49.909 |      |

Catalyst 1 (Table 3, entry 2)

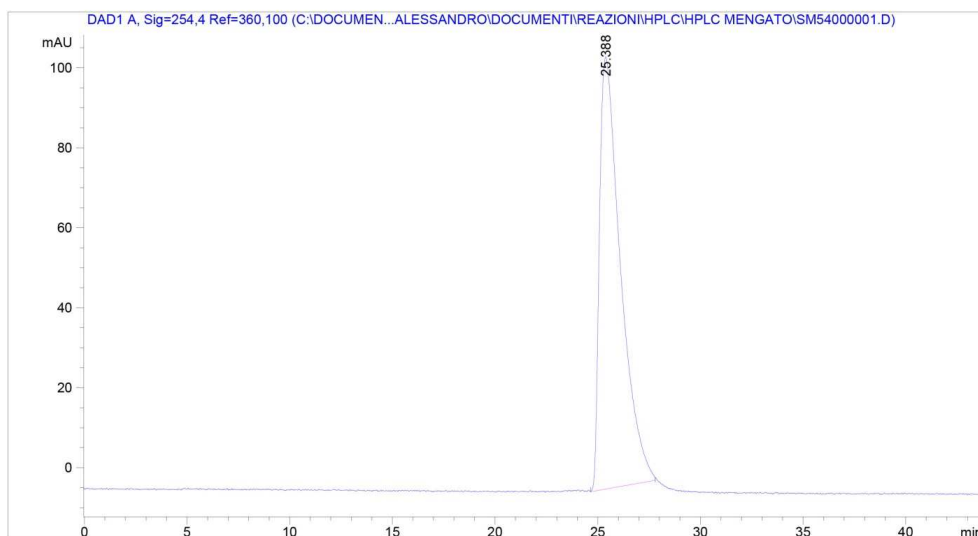

| RetTime [min] | k' | Area [mAU*s] | Height [mAU] | Symm. | Width [min] | Plates | Resol | Select |
|---------------|----|--------------|--------------|-------|-------------|--------|-------|--------|
|               |    |              |              |       |             |        | ution | ivity  |
| 25.388        | -  | 7703.85693   | 108.12427    | 0.39  | 1.0733      | 3099   | -     | -      |



## 2-(1-(4-Methoxyphenyl)-2,5-dioxopyrrolidin-3-yl)-2-methylpropanal (19)

Chiralpak AS-3 column, 230 nm, Hexane/Ethanol = 80:20, flow rate = 0.8 mL\*min<sup>-1</sup>.

Racemic mixture

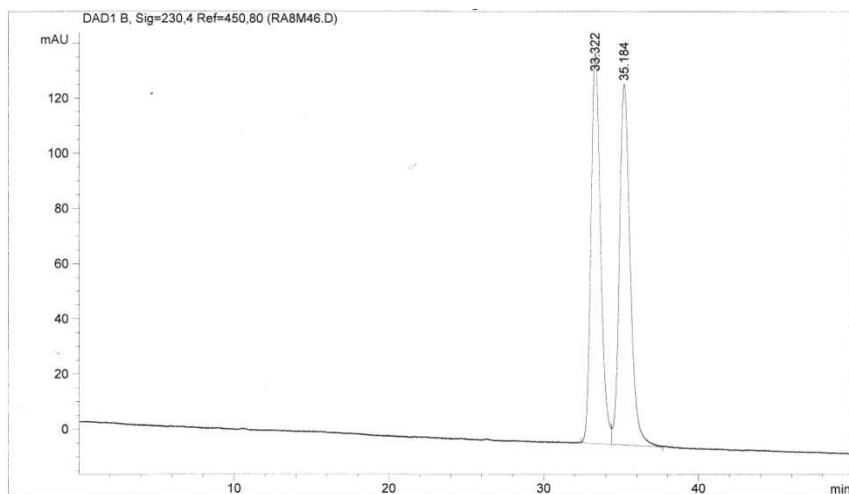

| Peak # | RetTime [min] | Type | Width [min] | Area [mAU*s] | Height [mAU] | Area %  |
|--------|---------------|------|-------------|--------------|--------------|---------|
| 1      | 33.322        | BV   | 0.6676      | 6122.04688   | 141.81790    | 49.2914 |
| 2      | 35.184        | VB   | 0.7373      | 6298.06445   | 130.90422    | 50.7086 |

Catalyst 1 (Table 3, entry 3)

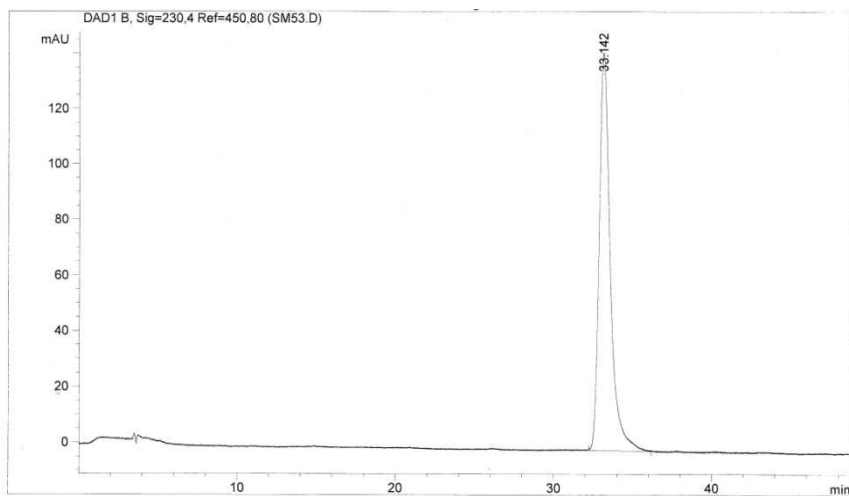

| Peak # | RetTime [min] | Type | Width [min] | Area [mAU*s] | Height [mAU] | Area %   |
|--------|---------------|------|-------------|--------------|--------------|----------|
| 1      | 33.142        | BB   | 0.7350      | 6988.18213   | 142.78363    | 100.0000 |

## 2-(1-Benzyl-2,5-dioxypyrrolidin-3-yl)-2-methylpropanal (20)

AD column, 210 nm, Hexane/2-Propanol = 80:20, flow rate = 0.5 mL\*min<sup>-1</sup>.

Racemic mixture

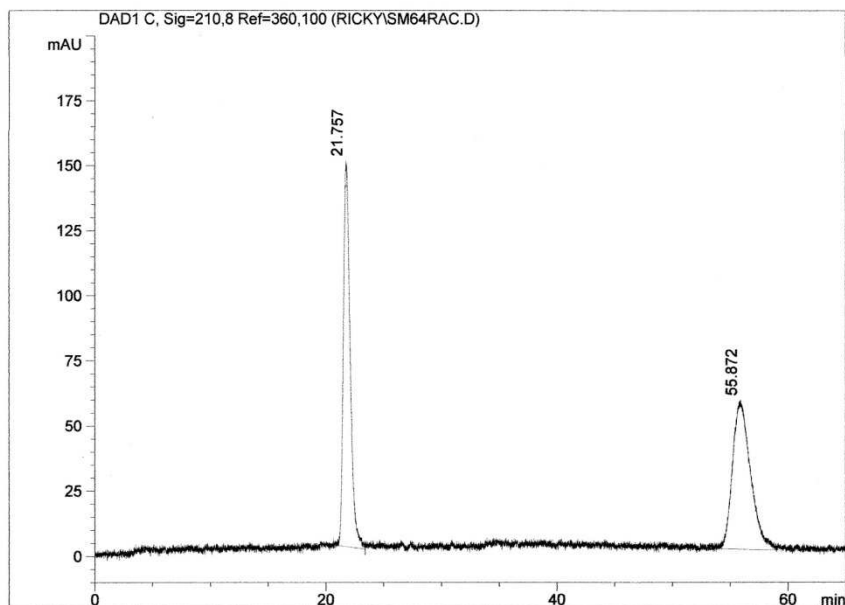

| Peak # | RT [min] | Type | Width [min] | Area     | Area % | Name |
|--------|----------|------|-------------|----------|--------|------|
| 1      | 21.757   | MM   | 0.683       | 6073.346 | 49.683 |      |
| 2      | 55.872   | MM   | 1.794       | 6150.751 | 50.317 |      |

Catalyst 1 (Table 3, entry 4)

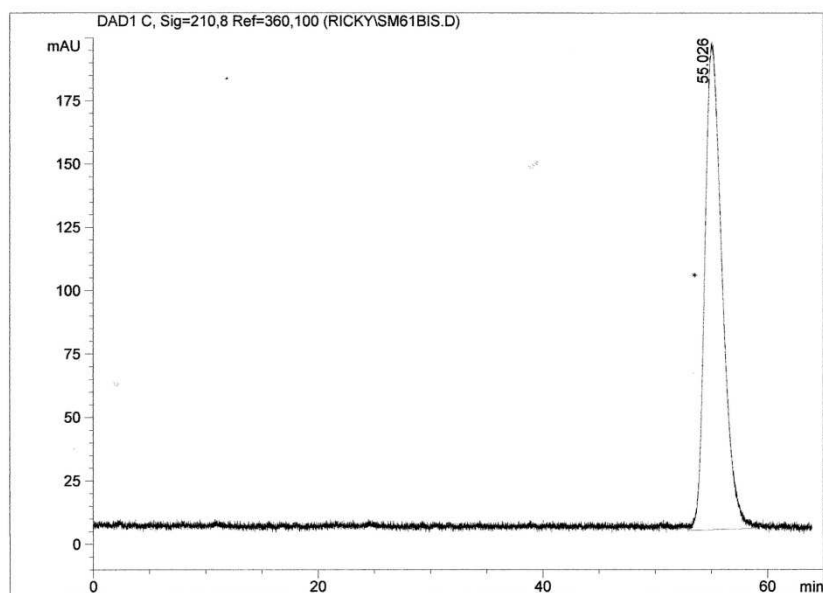

| Peak # | RT [min] | Type | Width [min] | Area      | Area %  | Name |
|--------|----------|------|-------------|-----------|---------|------|
| 1      | 55.026   | MM   | 1.781       | 20629.014 | 100.000 |      |

### 1-(2,5-Dioxo-1-phenylpyrrolidin-3-yl)cyclohexanecarbaldehyde (21)

OD-H column, 225 nm, Hexane/2-Propanol = 75:25, flow rate = 1 mL\*min<sup>-1</sup>.

Racemic mixture

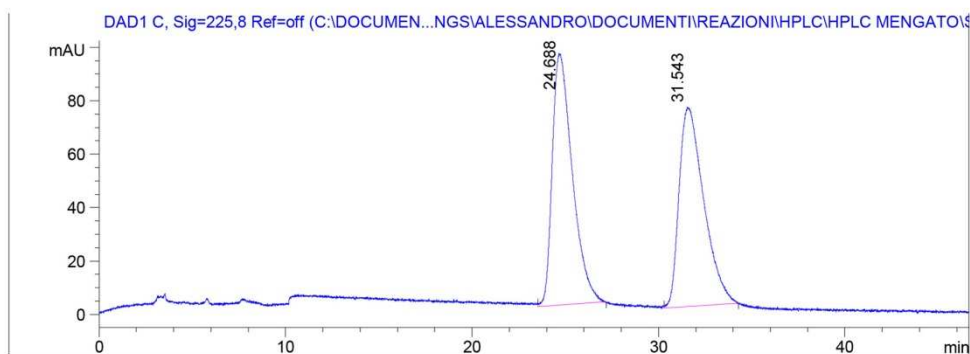

| Peak # | RT [min] | Type | Width [min] | Area     | Area % | Name |
|--------|----------|------|-------------|----------|--------|------|
| 1      | 24.688   | MM   | 1.248       | 7053.496 | 50.666 |      |
| 2      | 31.543   | MM   | 1.531       | 6868.023 | 49.334 |      |

Catalyst 1 (Table 3, entry 5)

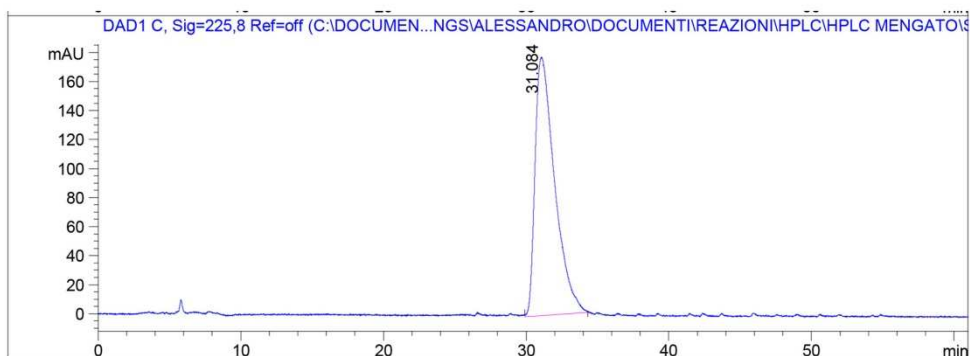

| Peak # | RT [min] | Type | Width [min] | Area      | Area %  | Name |
|--------|----------|------|-------------|-----------|---------|------|
| 1      | 31.084   | MM   | 1.591       | 17015.232 | 100.000 |      |

## 2-(2,5-dioxo-1-phenylpyrrolidin-3-yl)propanal (22)

AD column, 225 nm, Hexane/2-Propanol = 4:1, flow rate = 0.5 mL\*min<sup>-1</sup>.

Racemic diastomeric mixture

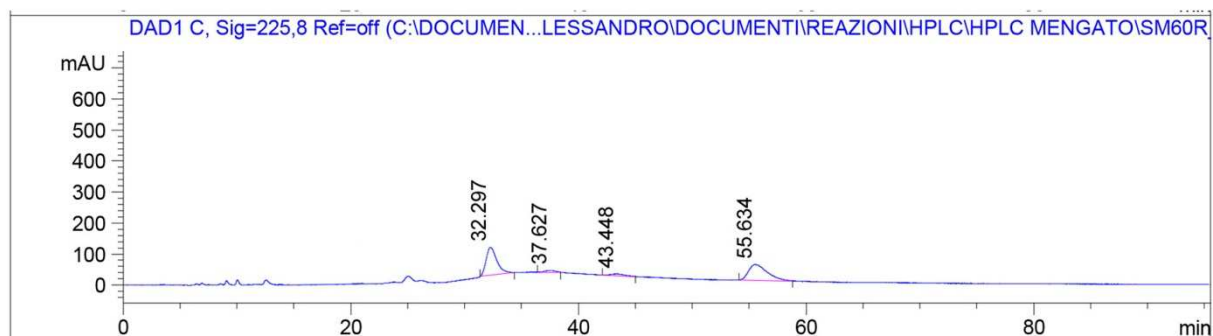

| Peak # | RT [min] | Type | Width [min] | Area     | Area % | Name |
|--------|----------|------|-------------|----------|--------|------|
| 1      | 32.297   | MM   | 1.093       | 5938.101 | 46.125 |      |
| 2      | 37.627   | MM   | 1.088       | 472.320  | 3.669  |      |
| 3      | 43.448   | MM   | 1.457       | 594.905  | 4.621  |      |
| 4      | 55.634   | MM   | 1.890       | 5868.683 | 45.586 |      |

Catalyst 1 (Table 3, entry 6)

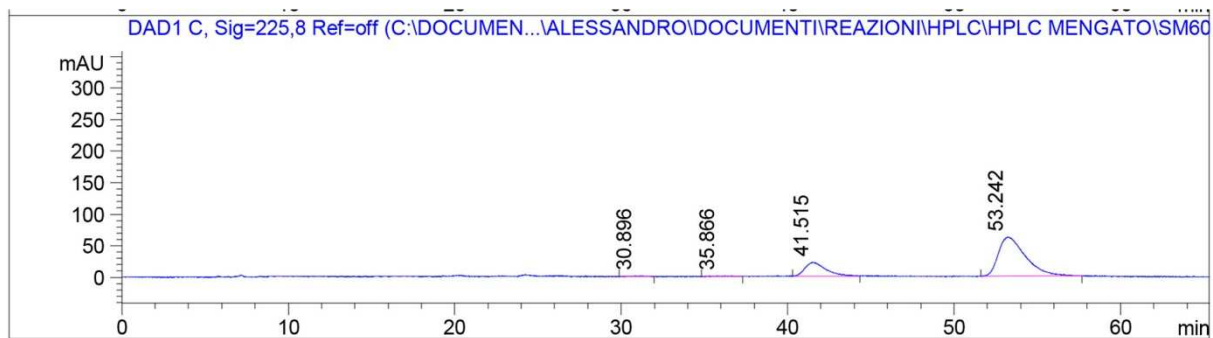

| Peak # | RT [min] | Type | Width [min] | Area     | Area % | Name |
|--------|----------|------|-------------|----------|--------|------|
| 1      | 30.896   | MM   | 0.799       | 57.647   | 0.627  |      |
| 2      | 35.866   | MM   | 1.003       | 75.150   | 0.817  |      |
| 3      | 41.515   | MM   | 1.448       | 1911.132 | 20.788 |      |
| 4      | 53.242   | MM   | 1.905       | 7149.464 | 77.767 |      |

### Michael addition of nitromethane to 4-phenylbut-3-en-2-one (24).

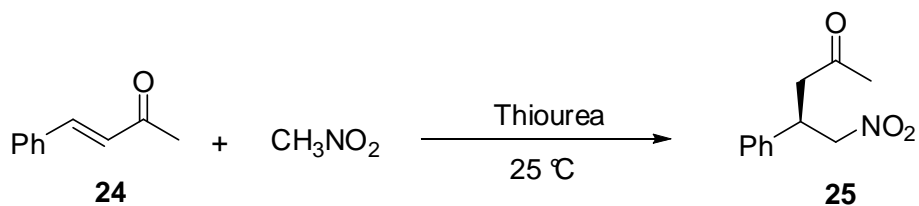

4-Phenylbut-3-en-2-one **24** and nitromethane were used as received. Spectroscopic data of product **25** were in full agreement with those reported in the literature.<sup>[6]</sup> Configuration of the major enantiomer obtained was established by comparison of measured optical rotation with the literature value. HPLC conditions are here reported:

### 5-Nitro-4-(*R*)-phenylpentan-2-one (25)

Lux3 Cellulose-3 column, 210 nm, Hexane/2-Propanol = 75:25, flow rate = 0,8 mL\*min<sup>-1</sup>.

*Racemic mixture*

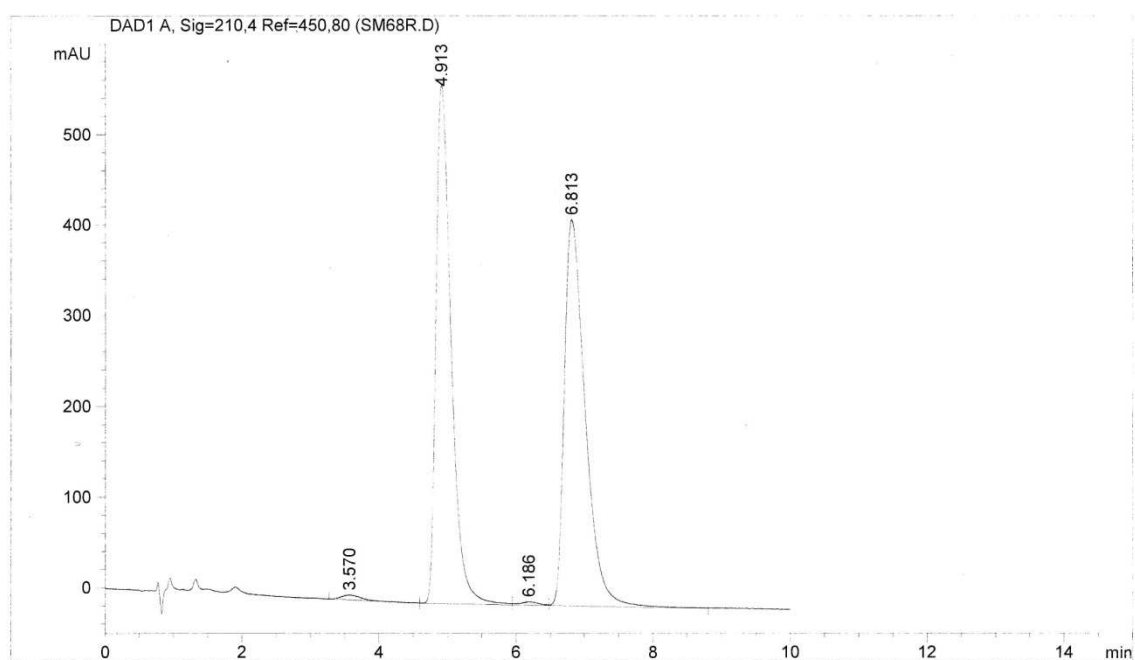

| Peak # | RetTime [min] | Type | Width [min] | Area [mAU*s] | Height [mAU] | Area %  |
|--------|---------------|------|-------------|--------------|--------------|---------|
| 1      | 3.570         | PP   | 0.2545      | 101.60098    | 5.23443      | 0.5670  |
| 2      | 4.913         | VV   | 0.2349      | 8748.62598   | 570.67963    | 48.8221 |
| 3      | 6.186         | VV   | 0.2373      | 65.33559     | 3.44477      | 0.3646  |
| 4      | 6.813         | VP   | 0.3227      | 9003.83789   | 425.84299    | 50.2463 |

*Catalyst 1 (Table 4, entry 1)*

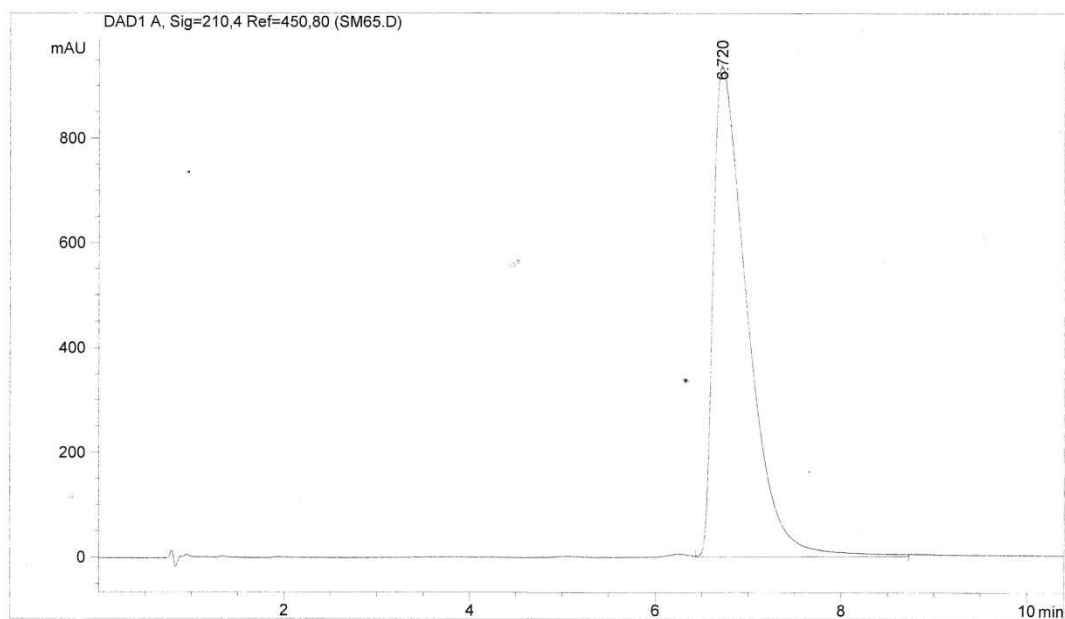

| Peak # | RetTime [min] | Type | Width [min] | Area [mAU*s] | Height [mAU] | Area %   |
|--------|---------------|------|-------------|--------------|--------------|----------|
| 1      | 6.720         | VV   | 0.3823      | 2.39279e4    | 935.97913    | 100.0000 |

*Catalyst 2 (Table 4, entry 2)*

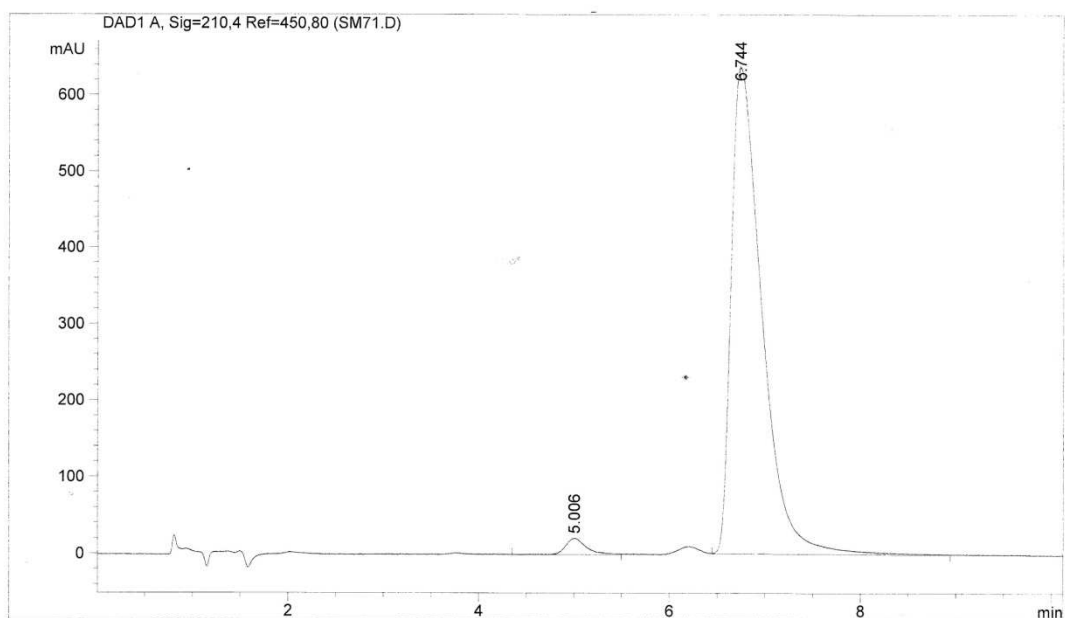

| Peak # | RetTime [min] | Type | Width [min] | Area [mAU*s] | Height [mAU] | Area %  |
|--------|---------------|------|-------------|--------------|--------------|---------|
| 1      | 5.006         | VBA  | 0.2313      | 324.16934    | 21.09611     | 2.2354  |
| 2      | 6.744         | BV   | 0.3321      | 1.41776e4    | 635.90295    | 97.7646 |

**Catalyst 3** (Table 4, entry 3)

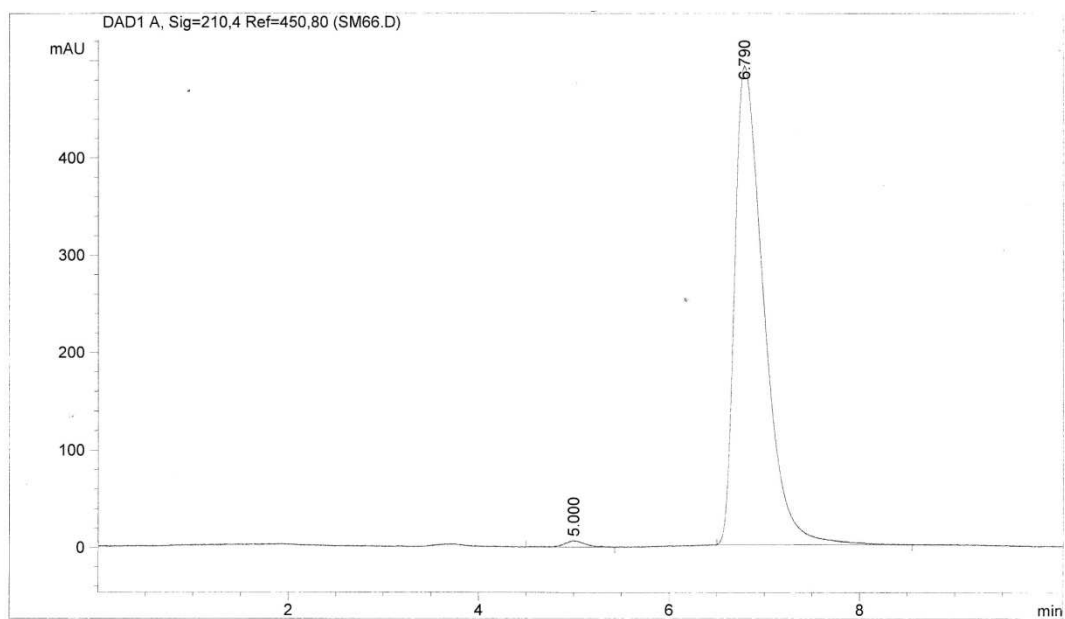

| Peak # | RetTime [min] | Type | Width [min] | Area [mAU*s] | Height [mAU] | Area %  |
|--------|---------------|------|-------------|--------------|--------------|---------|
| 1      | 5.000         | PP   | 0.2112      | 95.65063     | 6.22886      | 0.9114  |
| 2      | 6.790         | BB   | 0.3232      | 1.03987e4    | 490.81140    | 99.0886 |

**Catalyst 4** (Table 4, entry 4)

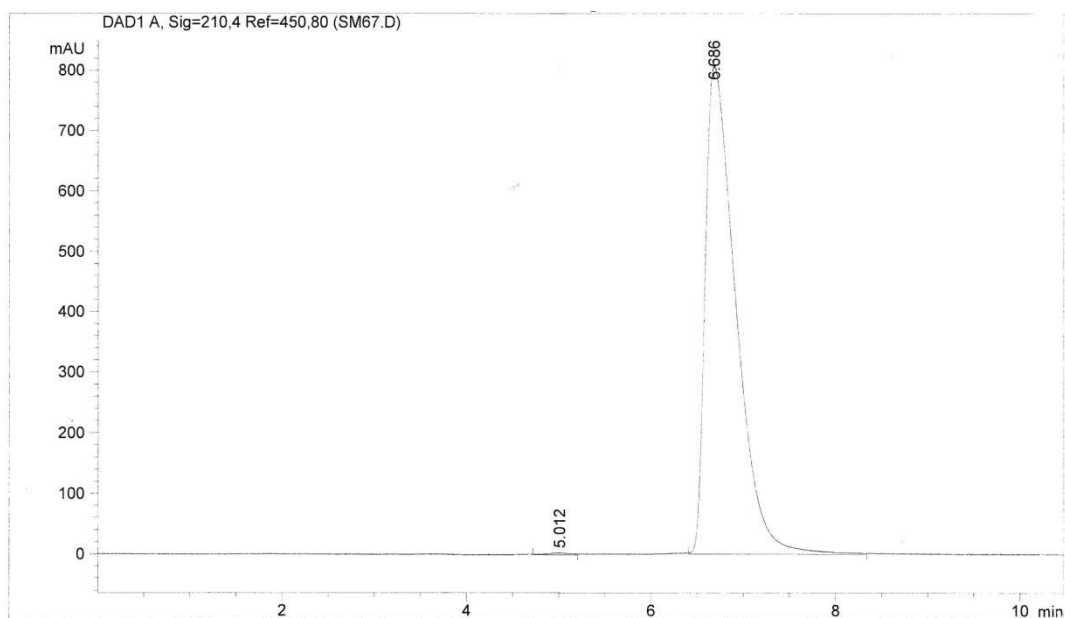

| Peak # | RetTime [min] | Type | Width [min] | Area [mAU*s] | Height [mAU] | Area %  |
|--------|---------------|------|-------------|--------------|--------------|---------|
| 1      | 5.012         | VV   | 0.2503      | 56.15127     | 3.23751      | 0.3014  |
| 2      | 6.686         | BV   | 0.3488      | 1.85742e4    | 806.29791    | 99.6986 |

**Michael addition of acetophenone to *trans*- $\beta$ -nitrostyrene (**26**).**

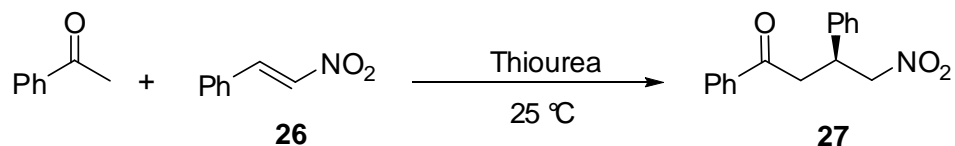

Acetophenone was distilled prior to use, *trans*- $\beta$ -nitrostyrene **26** was used as received. Spectroscopic data of product **27** were in full agreement with those reported in the literature.<sup>[7]</sup> Configuration of the major enantiomer obtained was established by of comparison of measured optical rotation with the literature value. HPLC conditions employed are here reported:

**5-Nitro-4-(*S*)-phenylpentan-2-one (**25**)**

Chiralpak AS-3 column, 210 nm, Hexane/2-Propanol = 80:20, flow rate = 0,8 mL\*min<sup>-1</sup>.

*Racemic mixture*

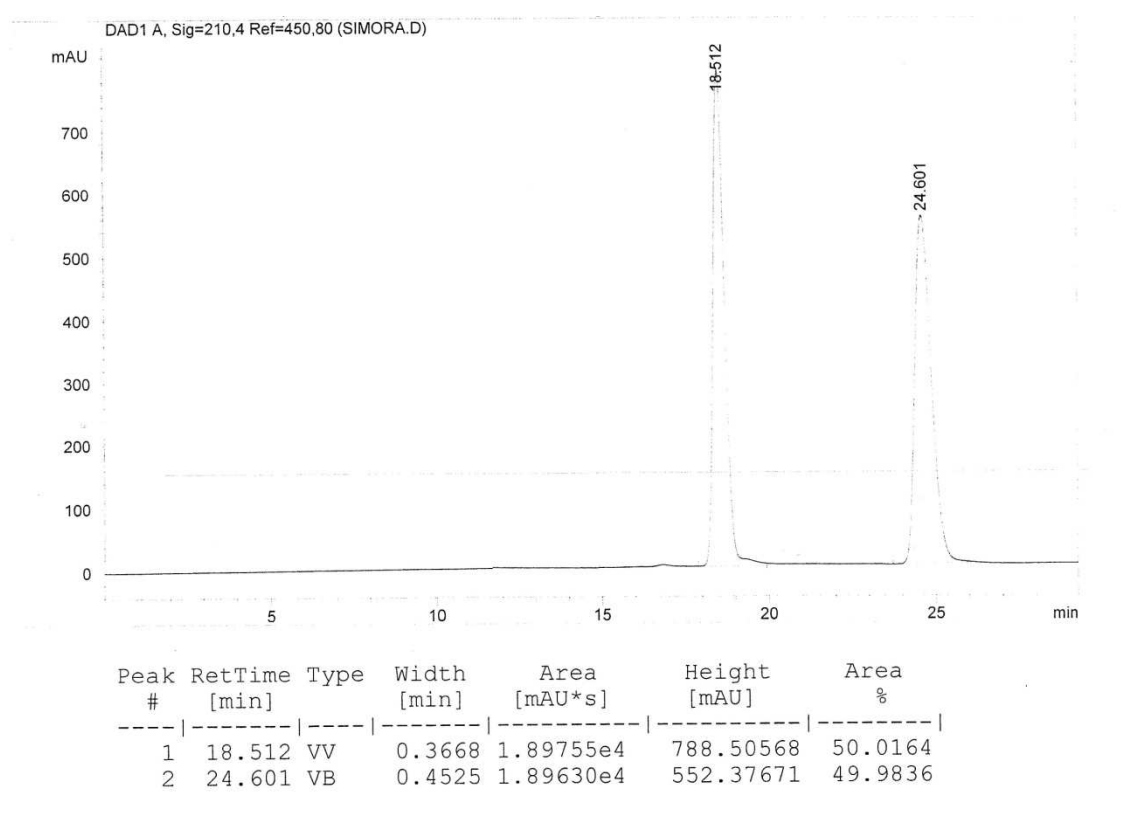

*Catalyst 1 (Table 4, entry 1)*



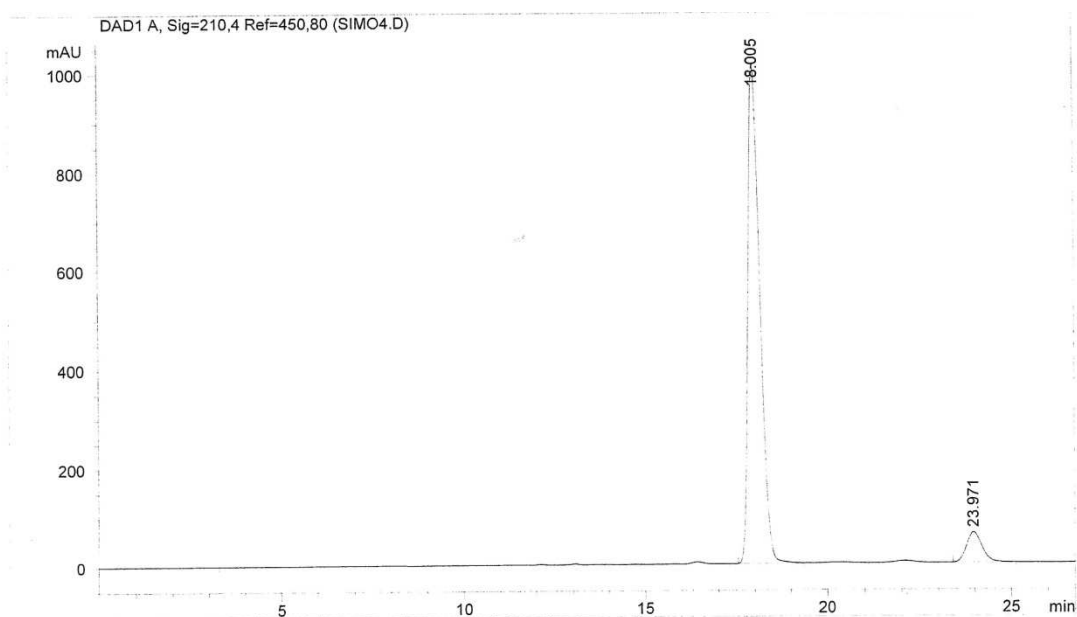

| Peak # | RetTime [min] | Type | Width [min] | Area [mAU*s] | Height [mAU] | Area %  |
|--------|---------------|------|-------------|--------------|--------------|---------|
| 1      | 18.005        | BB   | 0.3645      | 2.32832e4    | 1011.58948   | 92.5428 |
| 2      | 23.971        | BB   | 0.4684      | 1876.19019   | 62.11470     | 7.4572  |

*Catalyst 2 (Table 4, entry 2)*

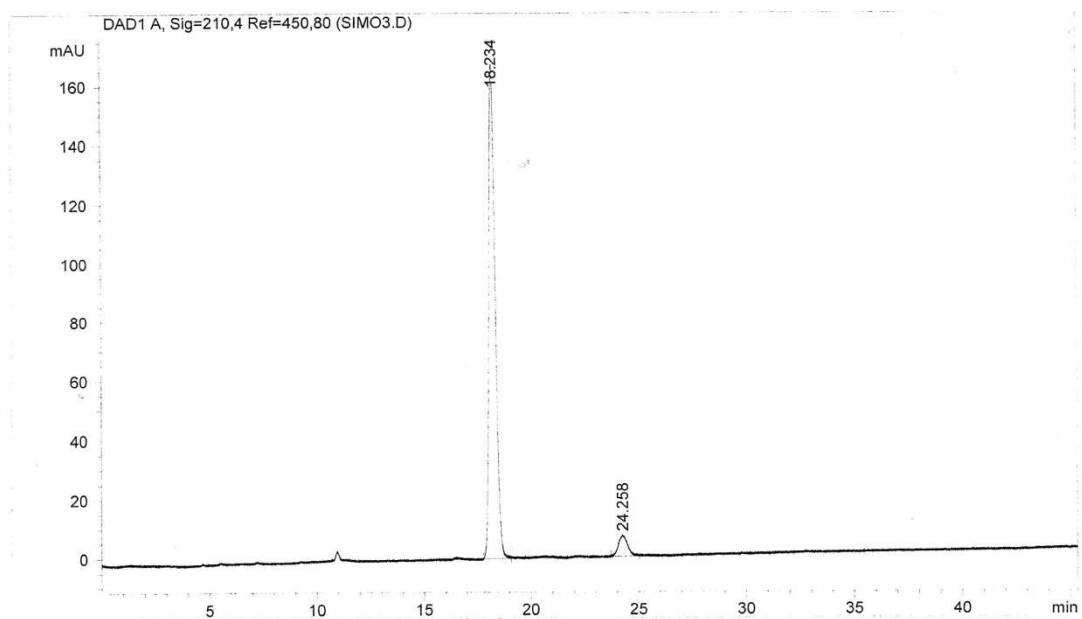

| Peak # | RetTime [min] | Type | Width [min] | Area [mAU*s] | Height [mAU] | Area %  |
|--------|---------------|------|-------------|--------------|--------------|---------|
| 1      | 18.234        | BB   | 0.3351      | 3598.36377   | 167.19955    | 94.4698 |
| 2      | 24.258        | BB   | 0.3951      | 210.64456    | 7.08080      | 5.5302  |

*Catalyst 3 (Table 4, entry 3)*

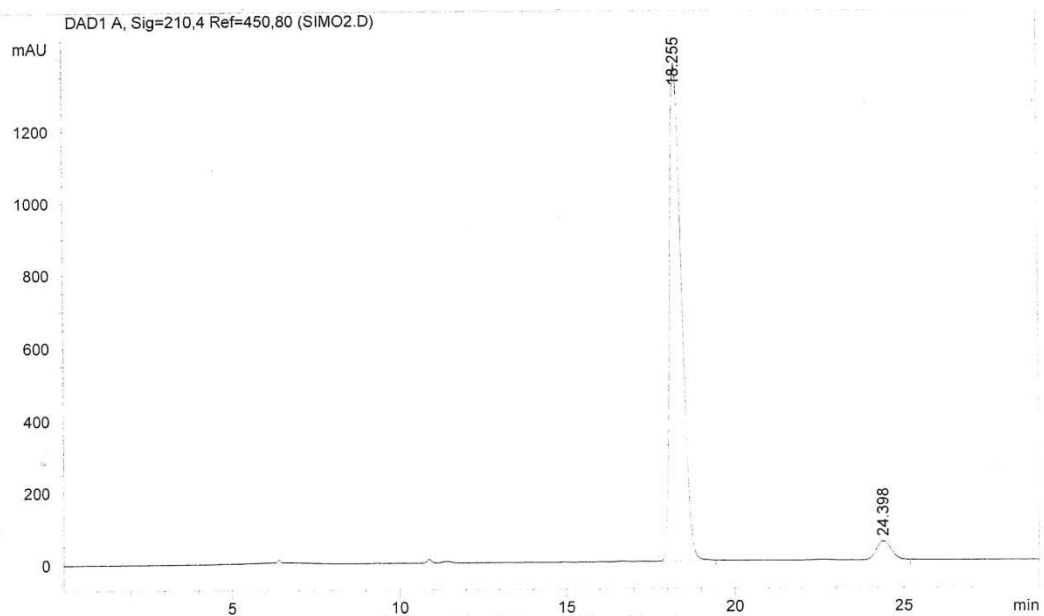

| Peak # | RetTime [min] | Type | Width [min] | Area [mAU*s] | Height [mAU] | Area %  |
|--------|---------------|------|-------------|--------------|--------------|---------|
| 1      | 18.255        | PB   | 0.3687      | 3.34391e4    | 1370.39233   | 95.4233 |
| 2      | 24.398        | VV   | 0.3629      | 1603.80408   | 52.13010     | 4.5767  |

*Catalyst 4 (Table 4, entry 4)*

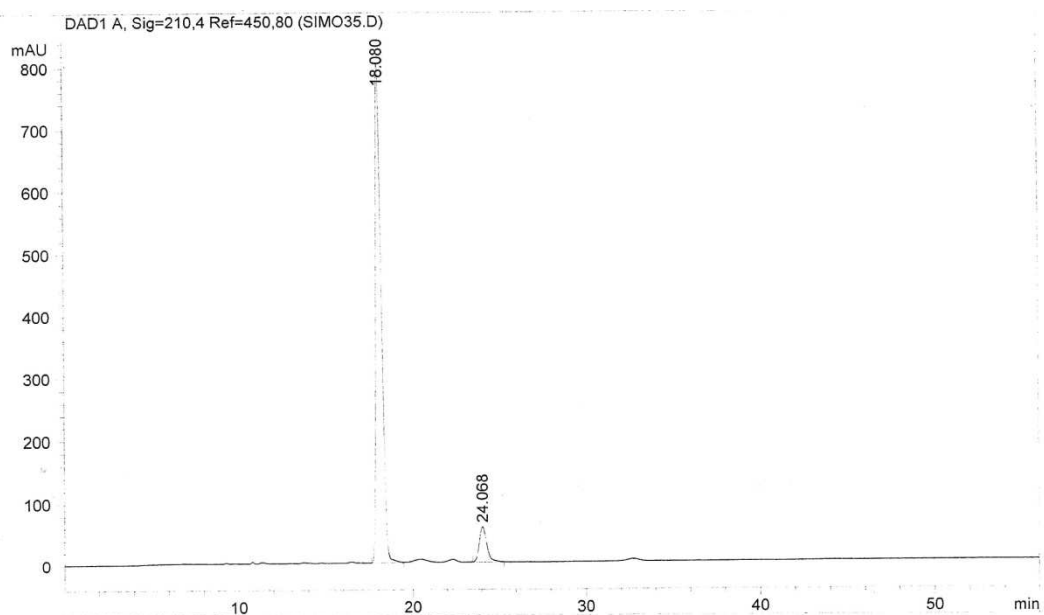

| Peak # | RetTime [min] | Type | Width [min] | Area [mAU*s] | Height [mAU] | Area %  |
|--------|---------------|------|-------------|--------------|--------------|---------|
| 1      | 18.080        | BB   | 0.3584      | 1.82799e4    | 800.46173    | 91.1947 |
| 2      | 24.068        | BB   | 0.4778      | 1765.00549   | 56.91182     | 8.8053  |

## References

- [1] M. P. Cava, A. A. Deana, K. Muth, M. J. Mitchell, *Organic Syntheses*, Coll. Vol. 5, 944.
- [2] N. Matuszak, G. Muccioli, G. Lobar, D. Lambert, *J. Med. Chem.* **2009**, *52*, 7410.
- [3] A. Robertson, D. Philip, N. Spencer, *Tetrahedron* **1995**, *55*, 11365.
- [4] J.-F. Bai, L. Peng, L. Wang, L.-X. Wang, X.-Y. Xu, *Tetrahedron* **2010**, *66*, 8928.
- [5] Z. Maa, Y. Liu, P. Li, H. Ren, Y. Zhu, J. Tao, *Tetrahedron: Asymmetry* **2011**, *22*, 1740.
- [6] K. Mei, M. Jin, S. Zhang, P. Li, W. Liu, X. Chen, F. Xue, W. Duan, W. Wang, *Org. Lett.* **2009**, *11*, 2864.
- [7] H. Huang, E. N. Jacobsen, *J. Am. Chem. Soc.* **2006**, *128*, 7170.
